# Supplementary material for: Insight into the construction of metal–organic polyhedra: metal–organic cubes as a case study
Source: Royal Society of Chemistry journal article supplement (doi:10.1039/c1sc00269d), 2011-01-01
Supplement: c1sc00269d.pdf [file c1sc00269d.pdf]

# **Insight into the Construction of Metal–Organic Polyhedra: Metal–Organic Cubes as a Case Study**

Mohamed H. Alkordi,<sup>†,‡</sup> Jonathan L. Belof,<sup>†</sup> Edwin Rivera,<sup>†</sup> Lukasz Wojtas,<sup>†</sup> and Mohamed Eddaoudi<sup>\*†,‡</sup>

<sup>†</sup>*Department of Chemistry, University of South Florida, Tampa, Florida 33620-5250*

<sup>‡</sup>*Advanced Membranes and Porous Materials Center, 4700 King Abdullah University of Science and Technology  
(KAUST), Thuwal, KSA*

Mohamed.Eddaoudi@kaust.edu.sa

|                                                                                                                                                                                                                                                                                                                                               |    |
|-----------------------------------------------------------------------------------------------------------------------------------------------------------------------------------------------------------------------------------------------------------------------------------------------------------------------------------------------|----|
| Experimental Details: .....                                                                                                                                                                                                                                                                                                                   | 3  |
| Synthetic procedures for compounds 1(a-f) and 2-4: .....                                                                                                                                                                                                                                                                                      | 4  |
| Crystallographic data table: .....                                                                                                                                                                                                                                                                                                            | 5  |
| Relaxation times table: .....                                                                                                                                                                                                                                                                                                                 | 6  |
| Crystal structure description for compounds 1(a-f), and 2-4: .....                                                                                                                                                                                                                                                                            | 7  |
| References .....                                                                                                                                                                                                                                                                                                                              | 28 |
| <b>Figure S1.</b> MALDI-TOF MS spectra for <b>1</b> . .....                                                                                                                                                                                                                                                                                   | 10 |
| <b>Figure S2.</b> $^1\text{H}$ NMR spectrum of <b>L1</b> in DMSO- $d_6$ . .....                                                                                                                                                                                                                                                               | 11 |
| <b>Figure S3.</b> $^1\text{H}$ - $\{^1\text{H}\}$ gCOSY spectrum for <b>1S</b> in D $_2$ O. Peak at 2.9 ppm and side band at 2.71 ppm are assigned for residual DMF solvent molecules from the reaction mixture. ....                                                                                                                         | 12 |
| <b>Figure S4.</b> $^1\text{H}$ - $\{^{13}\text{C}\}$ gHSQC spectrum for <b>1S</b> in D $_2$ O. ....                                                                                                                                                                                                                                           | 13 |
| <b>Figure S5.</b> (Above) $^{13}\text{C}$ NMR spectrum of <b>1S</b> in D $_2$ O. Peaks at 39.21 ppm and 43.65 ppm indicate different chemical shifts for C(4) and C(6) carbon atoms of <i>thp</i> rings, respectively, due to chelation of <b>L1</b> to cobalt ions. (Below) $^{13}\text{C}$ DEPT135° spectrum of <b>1S</b> in D $_2$ O. .... | 14 |
| <b>Figure S6.</b> $^1\text{H}$ 2D-DOSY spectrum for <b>1S</b> , 1.2 mM in D $_2$ O at 298 K. ....                                                                                                                                                                                                                                             | 15 |
| <b>Figure S7.</b> Job plot for the two binding species, CoCl $_2$ and H- <b>L1</b> in aqueous solution. Maximum absorbance reached at 0.4 mole fraction of Co ions, corresponding to 1.5:1 (ligand-to-cobalt) stoichiometry. ....                                                                                                             | 16 |
| <b>Figure S8.</b> The $^1\text{H}$ NMR spectrum for the reaction mixture. ....                                                                                                                                                                                                                                                                | 17 |
| <b>Figure S9.</b> The $^{13}\text{C}$ NMR spectrum for the reaction mixture. ....                                                                                                                                                                                                                                                             | 17 |
| <b>Figure S10.</b> The $^1\text{H}$ - $\{^1\text{H}\}$ gCOSY NMR spectrum for the reaction mixture. ....                                                                                                                                                                                                                                      | 18 |
| <b>Figure S11.</b> $^1\text{H}$ - $\{^1\text{H}\}$ NOESY NMR spectrum for the reaction mixture. ....                                                                                                                                                                                                                                          | 19 |
| <b>Figure S12.</b> $^1\text{H}$ - $\{^{13}\text{C}\}$ gHSQC NMR spectrum for the reaction mixture. ....                                                                                                                                                                                                                                       | 20 |
| <b>Figure S13.</b> The $^1\text{H}$ - $\{^1\text{H}\}$ TOCSY NMR spectrum for the reaction mixture. ....                                                                                                                                                                                                                                      | 21 |
| <b>Figure S14.</b> Stopped-flow kinetics of the 483nm absorption band for the complex. ....                                                                                                                                                                                                                                                   | 22 |
| <b>Figure S15.</b> Concentration dependence of lifetime ( <b>L1</b> concentration is indicated in the figure). ....                                                                                                                                                                                                                           | 22 |
| <b>Figure S16.</b> (Above) $^1\text{H}$ NMR spectra for the reaction mixture in D $_2$ O at various apparent solution pH. Spectra acquired at 298 K and referenced to DSS at 0 ppm, (below) variable temperature $^1\text{H}$ NMR spectra for <b>1S</b> in D $_2$ O, spectra are referenced to DSS as an internal standard at 0 ppm. ....     | 23 |
| <b>Figure S17.</b> Calculated (red) and experimental (black) X-ray powder diffraction patterns for <b>1</b> . ....                                                                                                                                                                                                                            | 24 |
| <b>Figure S18.</b> Calculated (red) and experimental (black) X-ray powder diffraction patterns for <b>1a</b> . ....                                                                                                                                                                                                                           | 24 |
| <b>Figure S19.</b> Calculated (red) and experimental (black) X-ray powder diffraction patterns for <b>1b</b> . ....                                                                                                                                                                                                                           | 25 |
| <b>Figure S20.</b> Calculated (red) and experimental (black) X-ray powder diffraction patterns for <b>1c</b> . ....                                                                                                                                                                                                                           | 25 |
| <b>Figure S21.</b> Calculated (red) and experimental (black) X-ray powder diffraction patterns for <b>1d</b> . ....                                                                                                                                                                                                                           | 26 |
| <b>Figure S22.</b> Calculated (red) and experimental (black) X-ray powder diffraction patterns for <b>2</b> . ....                                                                                                                                                                                                                            | 26 |
| <b>Figure S23.</b> Calculated (red) and experimental (black) X-ray powder diffraction patterns for <b>3</b> . ....                                                                                                                                                                                                                            | 27 |
| <b>Figure S24.</b> Calculated (red) and experimental (black) X-ray powder diffraction patterns for <b>4</b> . ....                                                                                                                                                                                                                            | 27 |

## Experimental Details:

**NMR measurements.** All  $^1\text{H}$  and  $^{13}\text{C}$  NMR spectra were acquired on Varian VXR (299.94 MHz for  $^1\text{H}$ , 75.55 MHz for  $^{13}\text{C}$ ), UnityINOVA 400 (399.78 MHz for  $^1\text{H}$ , 100.54 MHz for  $^{13}\text{C}$ ) equipped with Performa I single axis gradient Z amplifier and a Varian 5mm auto switchable Z gradient probe and variable temperature controller, or UnityINOVA 500 (499.76 MHz for  $^1\text{H}$ , 125.68 MHz for  $^{13}\text{C}$ ) equipped with a Performa II single axis Z gradient amplifier and a Varian 5mm Triple Resonance Z gradient probe spectrometers. The  $^1\text{H}$  chemical shifts are reported relative to that of TMS and referenced to either the internal HDO signal at 4.76 ppm, the singlet peak of 3-(trimethylsilyl)-1-propanesulfonic acid sodium salt (DSS) at 0 ppm, or DMSO- $d_6$  signal at 2.5 ppm, as indicated for each spectrum. Variable temperature measurements were conducted on a sample of **1** dissolved in  $\text{D}_2\text{O}$  and held at the specific temperature for 10 min prior to spectrum acquisition. Solution  $^1\text{H}$  NMR measurements at variable pH were conducted at 296 K on a mixture prepared by mixing  $\text{CoCl}_2$  (1 mmol, 0.066 M) and H-**L1** (1.5 mmol, 0.1 M) in 15 mL of  $\text{D}_2\text{O}$  (resulted pH = 6.63), stirred under aerobic conditions at 296 K for 1 h prior to pH adjustments. The pH is adjusted through incremental additions of either NaOD or  $\text{D}_2\text{SO}_4$ , as required, and the apparent solution pH values are reported. Measurements are made with Mettler Toledo EL02 pH meter calibrated with aqueous buffer solutions at 296 K.

**Spectrophotometric titration.** 15 solutions containing  $\text{CoCl}_2$  (20 mL, 2.5 mM, 0.05 mmol) and increasing amounts of H-**L1** (0.01-0.15 mmol, 0.01 mmol increment) were prepared. The pH values for each solution were measured at different time intervals. The mixtures were incubated at 296 K for 24 h, under atmospheric conditions, before conducting absorbance measurements at 493 nm.

**Single-Crystal X-ray Diffraction.** X-ray diffraction data were collected using Bruker-AXS SMART-APEX CCD diffractometer equipped with Mo  $K\alpha$  radiation source ( $\lambda = 0.71073 \text{ \AA}$ ) or SMART-APEX CCDII diffractometer equipped with Cu  $K\alpha$  ( $\lambda = 1.54178 \text{ \AA}$ ) radiation source, as indicated. Indexing was performed using SMART v5.625.<sup>1</sup> Frames were integrated with SaintPlus 6.28A<sup>2</sup> software package. Absorption correction was performed by multi-scan method implemented in SADABS.<sup>3</sup> Crystal structures were solved using SHELXS-97 and refined using SHELXL-97 contained in SHELXTL v6.10 and WinGX v1.70.01 programs packages.<sup>4</sup> All non-disordered non-hydrogen atoms were refined with anisotropic displacement parameters. All H-atoms bonded to carbon atoms were placed in geometrically optimized positions and refined with an isotropic displacement parameter fixed at 1.2 times  $U_q$ . N bonded protons were localized via Fourier difference map inspection and refined isotropically with thermal parameters, based on the N atoms to which they are bonded.

**Other Physical Measurements.** Powder X-ray diffraction (XRPD) data were collected using Cu  $K\alpha$  radiation ( $\lambda = 1.5406 \text{ \AA}$ ) on a Bruker AXS D8-Advance diffractometer. The MALDI-TOF MS spectrum was recorded on a Bruker Daltonics Autoflex III TOF/TOF mass spectrometer using  $\alpha$ -cyanohydroxy-cinnamic acid as the matrix. Solution UV-vis absorption spectra were collected on a PerkinElmer Lambda 900 spectrophotometer, with an attachment for solid samples and gaseous atmosphere. Stopped-flow kinetics data are collected on a Bio-Logic instrument (SFM300 mixer and MOS200M monochromator) and the data were fitted with Origin®.

**Computer Modelling.** The hydrated fragment  $[\text{Co}_2(\text{L1})(\text{H}_2\text{O})_8]^{3+}$ , with a +3 net charge and multiplicity of 7, was geometry optimized using the quantum chemistry code Gaussian 03.5 The minimized energy was calculated via Density Functional Theory (DFT) using the B3LYP hybrid exchange-correlation functional.<sup>6</sup> The unrestricted calculation employed the LANL2DZ basis set with an ECP applied to the cobalt atoms.<sup>7</sup>

## Synthetic procedures for compounds 1(a-f) and 2-4:

**[Co<sub>8</sub>(C<sub>11</sub>N<sub>6</sub>H<sub>15</sub>)<sub>12</sub>Br<sub>12</sub>·18H<sub>2</sub>O, 1a.** In a capped 25 mL scintillation vial, reaction of H-L1 (0.034 g, 0.15 mmol) and CoBr<sub>2</sub>·6H<sub>2</sub>O (0.0325 g, 0.1 mmol) in a mixture of DMF and water, 1 mL each, at 115°C for 12 h resulted in red polyhedral crystals (0.051 g, 90 % yield based on CoBr<sub>2</sub>) formulated as [Co<sub>8</sub>(C<sub>11</sub>N<sub>6</sub>H<sub>15</sub>)<sub>12</sub>]Br<sub>12</sub>·18H<sub>2</sub>O, from single-crystal X-ray diffraction.

**[Co<sub>8</sub>(C<sub>11</sub>N<sub>6</sub>H<sub>15</sub>)<sub>12</sub>(SO<sub>4</sub>)<sub>6</sub>(DMF)·31H<sub>2</sub>O, 1b.** In a capped 25 mL vial, reaction of H-L1 (0.034 g, 0.15 mmol) and Co(SO<sub>4</sub>)·6H<sub>2</sub>O (0.0263 g, 0.1 mmol) in a mixture of DMF and water, 1 mL each, at 115°C for 12 h resulted in red polyhedral crystals (0.023 g, 41.3% yield based on Co(SO<sub>4</sub>)) formulated as [Co<sub>8</sub>(C<sub>11</sub>N<sub>6</sub>H<sub>15</sub>)<sub>12</sub>](SO<sub>4</sub>)<sub>6</sub>(DMF)·31H<sub>2</sub>O, from single-crystal X-ray diffraction.

**[Co<sub>8</sub>(C<sub>11</sub>N<sub>6</sub>H<sub>15</sub>)<sub>12</sub>][CoCl<sub>4</sub>]<sub>2</sub>Cl<sub>8</sub>·21H<sub>2</sub>O, 1c.** In a capped 25 mL scintillation vial, reaction of H-L1 (0.034 g, 0.15 mmol) and CoCl<sub>2</sub>·6H<sub>2</sub>O (0.0237 g, 0.1 mmol) in a mixture of dimethylsulfoxide (DMSO) and water, 1 mL each, at 115°C for 24 h resulted in brown rectangular crystals (0.01 g, 23% yield based on CoCl<sub>2</sub>), formulated as [Co<sub>8</sub>(C<sub>11</sub>N<sub>6</sub>H<sub>15</sub>)<sub>12</sub>][CoCl<sub>4</sub>]<sub>2</sub>Cl<sub>8</sub>·21H<sub>2</sub>O, from single crystal X-ray diffraction.

**[Co<sub>8</sub>(C<sub>11</sub>N<sub>6</sub>H<sub>15</sub>)<sub>12</sub>(NO<sub>3</sub>)<sub>12</sub>·22H<sub>2</sub>O, 1d.** In an open 25 mL scintillation vial, a mixture of H-L1 (0.034 g, 0.15 mmol) and Co(NO<sub>3</sub>)<sub>2</sub>·6H<sub>2</sub>O (0.1 mmol) in *N,N*'-diethylformamide (DEF) and water, 1 mL each, was prepared and left to stand at r.t. After seven days the reaction volume was reduced to almost 1 mL through evaporation and red crystals were collected (0.038 g, 70.2% yield based on Co(NO<sub>3</sub>)<sub>2</sub>), formulated as [Co<sub>8</sub>(C<sub>11</sub>N<sub>6</sub>H<sub>15</sub>)<sub>12</sub>](NO<sub>3</sub>)<sub>12</sub>·22H<sub>2</sub>O from single crystal X-ray diffraction.

**[Co<sub>8</sub>(C<sub>11</sub>N<sub>6</sub>H<sub>15</sub>)<sub>12</sub>(BF<sub>4</sub>)<sub>12</sub>·2(DMF)·14H<sub>2</sub>O, 1e.** In a capped 25 mL scintillation vial, reaction of H-L1 (0.034 g, 0.15 mmol) and Co(BF<sub>4</sub>)<sub>2</sub>·6H<sub>2</sub>O (0.1 mmol) in a mixture of DMF and water, 1 mL each, at 115°C for 12 h resulted in red polyhedral crystals (0.04 g, 68.2% yield based on Co(BF<sub>4</sub>)<sub>2</sub>) formulated as [Co<sub>8</sub>(C<sub>11</sub>N<sub>6</sub>H<sub>15</sub>)<sub>12</sub>](BF<sub>4</sub>)<sub>12</sub>·2(DMF)·14H<sub>2</sub>O, from single-crystal X-ray diffraction.

**[Co<sub>8</sub>(C<sub>11</sub>N<sub>6</sub>H<sub>15</sub>)<sub>12</sub>Cl<sub>12</sub>·40H<sub>2</sub>O, 1f.** In a capped 25 mL scintillation vial, reaction of H-L1 (0.034 g, 0.15 mmol) and CoCl<sub>2</sub>·6H<sub>2</sub>O (0.1 mmol) in a mixture of hexamethylphosphoramide (HMPA) and water, 1 mL each, at 115°C for 12 h resulted in red polyhedral crystals (0.035 g, 63.7% yield based on CoCl<sub>2</sub>) formulated as [Co<sub>8</sub>(C<sub>11</sub>N<sub>6</sub>H<sub>15</sub>)<sub>12</sub>]Cl<sub>12</sub>·40H<sub>2</sub>O using single-crystal X-ray diffraction.

**[Ni<sub>4</sub>(C<sub>11</sub>N<sub>6</sub>H<sub>15</sub>)<sub>4</sub>](NO<sub>3</sub>)<sub>4</sub>(DMF)<sub>4</sub>, 2.** In a capped 25 mL scintillation vial, reaction of H-L1 (0.023 g, 0.1 mmol) and Ni(NO<sub>3</sub>)<sub>2</sub>·6H<sub>2</sub>O (0.1 mmol) in 1 mL of DMF at room temperature for 12 h, resulted in green-blue polyhedral crystals (0.006 g, 14 % yield based on Ni(NO<sub>3</sub>)<sub>2</sub>) formulated as [Ni<sub>4</sub>(C<sub>11</sub>N<sub>6</sub>H<sub>15</sub>)<sub>4</sub>](NO<sub>3</sub>)<sub>4</sub>(DMF)<sub>4</sub> using single crystal X-ray diffraction.

**[Cd(C<sub>11</sub>N<sub>6</sub>H<sub>15</sub>)(NO<sub>3</sub>)]<sub>n</sub>, 3.** In a capped 25 mL scintillation vial, reaction of H-L1 (0.023 g, 0.1 mmol) and Cd(NO<sub>3</sub>)<sub>2</sub>·4H<sub>2</sub>O (0.1 mmol) in 1 mL of DMF at 85°C for 12 h, resulted in colorless polyhedral crystals (0.017 g, 42 % yield based on Cd(NO<sub>3</sub>)<sub>2</sub>) formulated as [Cd(C<sub>11</sub>N<sub>6</sub>H<sub>15</sub>)(NO<sub>3</sub>)]<sub>n</sub> using single crystal X-ray diffraction.

**[In<sub>8</sub>(C<sub>11</sub>N<sub>6</sub>H<sub>15</sub>)<sub>12</sub>](NO<sub>3</sub>)<sub>12</sub>·4H<sub>2</sub>O, 4.** In a capped 25 mL scintillation vial, reaction of H-L1 (0.034 g, 0.15 mmol) and In(NO<sub>3</sub>)<sub>3</sub>·5H<sub>2</sub>O (0.1 mmol) in DEF (5 mL) and ethanol (2 mL) at 85°C for 12 h, resulted in colorless polyhedral crystals (0.0225 g, 40% yield based on In(NO<sub>3</sub>)<sub>3</sub>) formulated as [In<sub>8</sub>(C<sub>11</sub>N<sub>6</sub>H<sub>15</sub>)<sub>12</sub>](NO<sub>3</sub>)<sub>12</sub>·4H<sub>2</sub>O using crystal X-ray diffraction.

Crystallographic data table:

Table S1. Crystallographic data for 1-4 and 1(a-f).

|                                        | 1                                                                                                 | 2                                                                                                                 | 3                                                                                 | 4                                                                                                                 | 1a                                                                                                 |
|----------------------------------------|---------------------------------------------------------------------------------------------------|-------------------------------------------------------------------------------------------------------------------|-----------------------------------------------------------------------------------|-------------------------------------------------------------------------------------------------------------------|----------------------------------------------------------------------------------------------------|
| Formula                                | C <sub>132</sub> H <sub>180</sub> N <sub>72</sub> O <sub>4</sub> Co <sub>8</sub> Cl <sub>12</sub> | C <sub>56</sub> H <sub>88</sub> N <sub>32</sub> Ni <sub>4</sub>                                                   | C <sub>14</sub> H <sub>22</sub> N <sub>8</sub> O <sub>4</sub> Cd                  | C <sub>132</sub> H <sub>126</sub> N <sub>84</sub> O <sub>40</sub> In <sub>8</sub>                                 | C <sub>132</sub> H <sub>156</sub> N <sub>72</sub> O <sub>18</sub> Co <sub>8</sub> Br <sub>12</sub> |
| Fwt, Z                                 | 3729.96, 4                                                                                        | 1700.42, 4                                                                                                        | 478.80, 4                                                                         | 4442.39, 3                                                                                                        | 4469.65, 2                                                                                         |
| Crystal system                         | cubic                                                                                             | orthorhombic                                                                                                      | monoclinic                                                                        | trigonal                                                                                                          | monoclinic                                                                                         |
| Space group                            | <i>Pa</i> -3                                                                                      | <i>Pbca</i>                                                                                                       | <i>P2</i> <sub>1</sub> / <i>n</i>                                                 | <i>R</i> -3                                                                                                       | <i>P2</i> <sub>1</sub> / <i>n</i>                                                                  |
| <i>a</i> , Å                           | 25.1026(13)                                                                                       | 17.3775(12)                                                                                                       | 12.909(2)                                                                         | 28.1055(4)                                                                                                        | 17.758(5)                                                                                          |
| <i>b</i> , Å                           | 25.1026(13)                                                                                       | 17.4940(12)                                                                                                       | 12.0710(19)                                                                       | 28.1055(4)                                                                                                        | 19.380(3)                                                                                          |
| <i>c</i> , Å                           | 25.1026(13)                                                                                       | 24.6892(17)                                                                                                       | 12.950(2)                                                                         | 19.1669(6)                                                                                                        | 24.772(6)                                                                                          |
| $\alpha^\circ$                         | 90                                                                                                | 90                                                                                                                | 90                                                                                | 90                                                                                                                | 90                                                                                                 |
| $\beta^\circ$                          | 90                                                                                                | 90                                                                                                                | 115.858(2)                                                                        | 90                                                                                                                | 90.257(16)                                                                                         |
| $\gamma^\circ$                         | 90                                                                                                | 90                                                                                                                | 90                                                                                | 120                                                                                                               | 90                                                                                                 |
| Wavelength, Å                          | 0.71073                                                                                           | 1.54178                                                                                                           | 0.71073                                                                           | 1.54178                                                                                                           | 1.54178                                                                                            |
| T, K                                   | 100(2)                                                                                            | 100(2)                                                                                                            | 100(2)                                                                            | 100(2)                                                                                                            | 293(2)                                                                                             |
| Final R indices,<br>[I>2 $\sigma$ (I)] | R1 = 0.0493,<br>wR2 = 0.1350                                                                      | R1 = 0.0702,<br>wR2 = 0.1688                                                                                      | R1 = 0.0401,<br>wR2 = 0.0966                                                      | R1 = 0.0577,<br>wR2 = 0.1351                                                                                      | R1 = 0.0826,<br>wR2 = 0.2615                                                                       |
| GOF on <i>F</i> <sup>2</sup>           | 1.026                                                                                             | 1.005                                                                                                             | 1.052                                                                             | 1.031                                                                                                             | 0.975                                                                                              |
|                                        | 1b                                                                                                | 1c                                                                                                                | 1d                                                                                | 1e                                                                                                                | 1f                                                                                                 |
| Formula                                | C <sub>135</sub> H <sub>175</sub> N <sub>73</sub> O <sub>56</sub> S <sub>6</sub> Co <sub>8</sub>  | C <sub>138</sub> H <sub>156</sub> N <sub>72</sub> O <sub>8</sub> S <sub>3</sub> Co <sub>10</sub> Cl <sub>16</sub> | C <sub>132</sub> H <sub>156</sub> N <sub>84</sub> O <sub>59</sub> Co <sub>8</sub> | C <sub>138</sub> H <sub>178</sub> N <sub>74</sub> O <sub>16</sub> B <sub>12</sub> Co <sub>8</sub> F <sub>48</sub> | C <sub>132</sub> H <sub>168</sub> N <sub>72</sub> O <sub>40</sub> Co <sub>8</sub> Cl <sub>12</sub> |
| Fwt, Z                                 | 4380.28, 2                                                                                        | 4260.03, 2                                                                                                        | 4326.85, 2                                                                        | 4654.7, 4                                                                                                         | 4300.22, 4                                                                                         |
| Crystal system                         | monoclinic                                                                                        | monoclinic                                                                                                        | monoclinic                                                                        | monoclinic                                                                                                        | monoclinic                                                                                         |
| Space group                            | <i>P2</i> <sub>1</sub> / <i>n</i>                                                                 | <i>C2</i> / <i>m</i>                                                                                              | <i>P2</i> <sub>1</sub> / <i>n</i>                                                 | <i>C2</i> / <i>c</i>                                                                                              | <i>C2</i> / <i>c</i>                                                                               |
| <i>a</i> , Å                           | 20.3067(9)                                                                                        | 28.550(2)                                                                                                         | 20.155(5)                                                                         | 31.693(3)                                                                                                         | 33.008(8)                                                                                          |
| <i>b</i> , Å                           | 18.7195(8)                                                                                        | 22.5268(19)                                                                                                       | 19.422(5)                                                                         | 20.047(4)                                                                                                         | 19.253(5)                                                                                          |
| <i>c</i> , Å                           | 24.9104(10)                                                                                       | 19.4189(16)                                                                                                       | 22.792(6)                                                                         | 32.309(6)                                                                                                         | 32.654(7)                                                                                          |
| $\alpha^\circ$                         | 90                                                                                                | 90                                                                                                                | 90                                                                                | 90                                                                                                                | 90                                                                                                 |
| $\beta^\circ$                          | 93.1820(10)                                                                                       | 131.977(3)                                                                                                        | 90.221(2)                                                                         | 109.50(3)                                                                                                         | 116.116(5)                                                                                         |
| $\gamma^\circ$                         | 90                                                                                                | 90                                                                                                                | 90                                                                                | 90                                                                                                                | 90                                                                                                 |
| Wavelength, Å                          | 1.54178                                                                                           | 1.54178                                                                                                           | 1.54178                                                                           | 1.54180                                                                                                           | 1.54180                                                                                            |
| T, K                                   | 100(2)                                                                                            | 293(2)                                                                                                            | 293(2)                                                                            | 100(2)                                                                                                            | 100(2)                                                                                             |
| Final R indices [I>2 $\sigma$ (I)]     | R1 = 0.0737,<br>wR2 = 0.1794                                                                      | R1 = 0.0833,<br>wR2 = 0.2286                                                                                      | R1 = 0.0782,<br>wR2 = 0.1921                                                      | 0.0789, wR2 = 0.1715                                                                                              | 0.0714, wR2 = 0.1662                                                                               |
| GOF on <i>F</i> <sup>2</sup>           | 1.025                                                                                             | 1.038                                                                                                             | 1.041                                                                             | 0.942                                                                                                             | 1.022                                                                                              |

## Relaxation times table:

**Table S2.** Experimental spin–lattice relaxation times ( $T_1$ ) for  $^1\text{H}$  signals (in the 7–24 ppm chemical shift range) of the paramagnetic reaction mixture, the corresponding cobalt-to-proton ( $r_{\text{Co-H}}$ ) distances relative to the reference distance of 5.324 Å for the proton at  $\delta = 8.68$  ppm, and the  $r_{\text{Co-H}}$  distances obtained from the geometrically-optimized model of  $[\text{Co}_2(\text{L1})(\text{H}_2\text{O})_8]^{3+}$  fragment.

| <b>Chemical Shift<br/><math>\delta</math> (ppm)</b> | <b><math>T_1</math> (s)</b> | <b><math>r_{\text{Co-H}}</math><br/>(experimental)</b> | <b><math>r_{\text{Co-H}}</math><br/>(model)</b> |
|-----------------------------------------------------|-----------------------------|--------------------------------------------------------|-------------------------------------------------|
| <b>7.652</b>                                        | 0.1051                      | 5.683                                                  | 5.953                                           |
| <b>8.68</b>                                         | 0.0710                      | 5.324                                                  | 5.324                                           |
| <b>9.319</b>                                        | 0.1226                      | 5.831                                                  | 5.890                                           |
| <b>10.168</b>                                       | 0.0859                      | 5.495                                                  | 5.345                                           |
| <b>10.608</b>                                       | 0.0854                      | 5.490                                                  | 5.452                                           |
| <b>12.763</b>                                       | 0.0217                      | 4.370                                                  | 4.506                                           |
| <b>13.452</b>                                       | 0.0455                      | 4.943                                                  | 5.285                                           |
| <b>17.105</b>                                       | 0.0240                      | 4.443                                                  | 4.742                                           |
| <b>21.969</b>                                       | 0.0047                      | 3.386                                                  | 3.499                                           |
| <b>23.546</b>                                       | 0.0103                      | 3.858                                                  | 3.692                                           |

## Crystal structure description for compounds 1(a-f), and 2-4:

**Single Crystal X-ray Structure Analysis of 1a,  $[\text{Co}_8(\text{C}_{11}\text{N}_6\text{H}_{15})_{12}]\text{Br}_{12}\cdot 18\text{H}_2\text{O}$ .** In the crystal structure of **1a**, the cationic MOCs crystallize in the monoclinic  $P2_1/n$  space group where the charge is balanced by twelve bromide counterions. Six bromide counterions decorate the faces of a MOC where hydrogen bond interactions between bromide ions and the pyrrole-type nitrogen atoms are present ( $\text{N1}'\cdots\text{Br}$  distances of 3.0–3.394 Å), in a similar manner observed in **1**. One bromide ion occupies the cavity inside the MOC and the remaining five bromide ions are geometrically disordered over several positions. The aliphatic carbon atoms C5' are geometrically disordered. The Co–N bond lengths, 1.916–1.986 Å (*thp*) and 1.841–1.907 Å (imidazolate), are similar to those observed in **1**. On each of the six faces of a MOC, two parallel imidazolate rings are separated by centroid-to-centroid distances of 5.627–5.697 Å.

**Single Crystal X-ray Structure Analysis of 1b,  $[\text{Co}_8(\text{C}_{11}\text{N}_6\text{H}_{15})_{12}](\text{SO}_4)_6\cdot(\text{DMF})\cdot 31\text{H}_2\text{O}$ .** MOCs in **1b** crystallize in the monoclinic,  $P2_1/n$  space group where each face of a MOC is decorated by a sulfate counterion, H-bonded to N1' atoms of *thp* rings. Each sulfate counterion is hydrogen bonded through two oxygen atoms to four N1' ( $\text{N1}'\cdots\text{O}=\text{S}$  distances of 2.824–3.057 Å). Such multiple interactions between each sulfate ion and the N1' atoms appear to cause a noticeable decrease in the centroid-to-centroid distance (5.375–5.408 Å) between the two parallel imidazolate rings on each of the six faces of the MOC, shorter than those observed in **1** and **1a** for chloride (5.505 Å) and bromide (5.627–5.697 Å) counterions, respectively. The Co–N bond lengths of 1.917–1.994 Å (*thp*), and 1.89–1.895 Å (imidazolate), closely matches those observed in **1** and **1a**.

**Single Crystal X-ray Structure Analysis of 1c,  $[\text{Co}_8(\text{C}_{11}\text{N}_6\text{H}_{15})_{12}][\text{CoCl}_4]_2\text{Cl}_8\cdot 21\text{H}_2\text{O}$ .** In **1c**, discrete MOCs crystallize in the monoclinic  $C2/m$  space group. Each MOC cocrystallize with two  $[\text{CoCl}_4]^{2-}$  anions involved in hydrogen bond interactions to adjacent MOC ( $\text{C}=\text{H}\cdots\text{Cl}$  distances of 2.608–2.935 Å, normalized data). Charge balance is satisfied by eight chloride counterions. One chloride counterion occupies the cavity inside the MOC. The additional seven  $\text{Cl}^-$  ions, geometrically disordered over multiple positions adjacent to the faces of the MOC, are H-bonded to the N1' atoms on each of the faces of the MOC ( $\text{N}\cdots\text{Cl}$  distances of 3.21–3.615 Å). In the MOC, Co–N bond lengths of 1.945–1.953 Å (*thp*) and 1.88–1.901 Å (imidazolate) are in close agreement with those observed in compounds **1-1b**. On each of the six faces of a MOC, two parallel imidazolate rings are separated by centroid-to-centroid distances of 5.569–5.58 Å.

**Single Crystal X-ray Structure Analysis of 1d,  $[\text{Co}_8(\text{C}_{11}\text{N}_6\text{H}_{15})_{12}](\text{NO}_3)_{12}\cdot 22\text{H}_2\text{O}$ .** The cationic MOCs in **1d** crystallize in the  $P2_1/n$  space group and the charge is balanced by twelve disordered nitrate counterions. One nitrate ion occupies the cavity inside the MOC and is hydrogen bonded to the C2 hydrogen atoms of the imidazolate rings, ( $\text{C}\cdots\text{O}$  distances of 2.268–2.901 Å). The remaining nitrates ions are hydrogen bonded to the  $\text{N1}'$  atoms of the ligand molecules, decorating the faces ( $\text{N}\cdots\text{O}$  distances of 2.903–3.067 Å) and the edges ( $\text{N}\cdots\text{O}$  distances of 2.894–2.981 Å) of the MOC. In the crystal structure of **1d**, the MOCs are held together through bridging, hydrogen bonded, nitrate counterions. In the MOC, Co–N bond lengths of 1.932–1.95 Å (*thp*) and 1.899–1.921 Å (imidazolate) are in close agreement with those observed in compounds **1-1c**. On each of the six faces of a MOC, two parallel imidazolate rings are separated by centroid-to-centroid distances of 5.623–5.69 Å.

**Single Crystal X-ray Structure Analysis of 1e,  $[\text{Co}_8(\text{C}_{11}\text{N}_6\text{H}_{15})_{12}](\text{BF}_4)_{12}\cdot 2(\text{DMF})\cdot 14\text{H}_2\text{O}$ .** The cationic MOCs in **1e** crystallize in the  $C2/c$  space group where the charge is balanced by twelve  $(\text{BF}_4)^-$  counterions. One disordered  $(\text{BF}_4)^-$  ion occupies the cavity inside the MOC while the remaining disordered  $(\text{BF}_4)^-$  ions are hydrogen bonded to the  $\text{N1}'$  atoms of the ligand molecules, decorating the faces and edges of the MOC. In the crystal structure of **1e**, the MOCs are held together through bridging, hydrogen bonded,  $(\text{BF}_4)^-$  counterions. In the MOC, Co–N bond lengths of 1.937–1.940 Å (*thp*) and 1.896–1.918 Å (imidazolate) are in close agreement with those observed in compounds **1-1d**. In **1e**, each MOC cocrystallize with two DMF solvent molecules hydrogen bonded to two faces of the MOC, ( $\text{N}\cdots\text{O}$  distances of 2.806–2.849 Å). On each of the six faces of a MOC, two parallel imidazolate rings are separated by centroid-to-centroid distances of 5.631–5.672 Å.

**Single Crystal X-ray Structure Analysis of 1f,  $[\text{Co}_8(\text{C}_{11}\text{N}_6\text{H}_{15})_{12}]\text{Cl}_{12}\cdot 40\text{H}_2\text{O}$ .** The cationic MOCs in **1f** crystallize in the  $C2/c$  space group where the charge is balanced by twelve chloride counterions. One chloride ion occupies the cavity inside the MOC. The remaining chloride ions are hydrogen bonded to the  $\text{N1}'$  atoms of the ligand molecules, decorating the faces ( $\text{N}\cdots\text{Cl}$  distances of 3.139–3.231 Å) and the edges ( $\text{N}\cdots\text{Cl}$  distances of 2.888–3.141 Å) of the MOC. In the crystal structure of **1f**, the MOCs are held together through bridging, hydrogen bonded, water molecules. In the MOC, Co–N bond lengths of 1.937–1.956 Å (*thp*) and 1.895–1.909 Å (imidazolate) are in close agreement with those observed in compounds **1-1e**. On each of the six faces of a MOC, two parallel imidazolate rings are separated by centroid-to-centroid distances of 5.641–5.661 Å.



**Single Crystal X-ray Structure Analysis of 2,  $[\text{Ni}_4(\text{C}_{11}\text{N}_6\text{H}_{15})_4](\text{NO}_3)_4 \cdot 4(\text{DMF})$ .** In the crystal structure of **2**, each Ni(II) ion is coordinated to one nitrate ion in bidentate fashion and two ligands **L1**, *cis*- $\text{MN}_4\text{O}_2$ . Each neutral molecular square crystallizes with four DMF solvent molecules. The four ligand molecules, forming molecular squares, are hydrogen bonded through N1' atoms to four DMF molecules ( $\text{N}\cdots\text{O}$  distances of 2.897–2.99 Å). Intramolecular H-bonds between the two *thp* rings of the molecular square are present ( $\text{N}-\text{H}\cdots\text{N}$  distances of 2.279–2.289 Å). Ni–N bond lengths are in the range of 2.033–2.073 Å (*thp*) and 2.023–2.045 Å (imidazolate).

**Single Crystal X-ray Structure Analysis of 3,  $[\text{Cd}(\text{C}_{11}\text{N}_6\text{H}_{15})(\text{NO}_3)]_n$ .** The extended structure, chain, in **3** result from coordination of mono-deprotonated **L1** and Cd(II) ions, distorted octahedral *cis*- $\text{MN}_4\text{O}_2$ . Each ligand in the chains is H-bonded to one DMF molecule and to a nitrate ion from the adjacent chain. Furthermore, intramolecular H-bonds exist between the  $\text{sp}^3$ -type N1' atoms ( $\text{N}-\text{H}\cdots\text{N}$  distances of 2.377–2.610 Å). In **3**, Cd–N bond lengths of 2.231–2.269 Å (*thp*) and 2.311–2.374 Å (imidazolate) are observed.

**Single Crystal X-ray Structure Analysis of 4,  $[\text{In}_8(\text{C}_{11}\text{N}_6\text{H}_{15})_{12}](\text{NO}_3)_{12} \cdot 4\text{H}_2\text{O}$ .** The cationic MOCs in **4** crystallize in the *R*-3 space group where the charge is balanced by twelve nitrate counterions. One nitrate ion occupies the cavity inside the MOC. Six nitrates ions are hydrogen bonded to the N1' atoms of the ligand molecules on the faces of the MOC ( $\text{N}\cdots\text{O}$  distances of 2.706–3.032 Å). The other five nitrate ions are geometrically disordered over several positions. In the MOC, the In–N bond lengths are in the range of 2.176–2.25 Å (*thp*) and 2.203–2.223 Å (imidazolate). On each of the six faces of a MOC, the centroid-to-centroid distance between two parallel imidazolate rings is 6.465 Å.

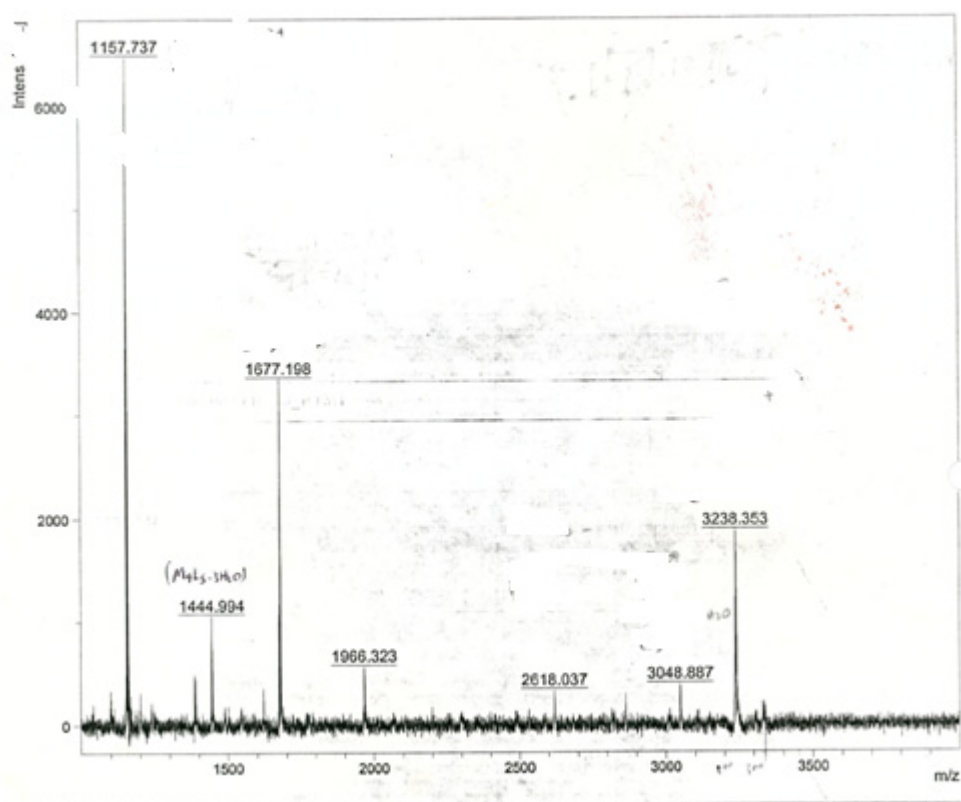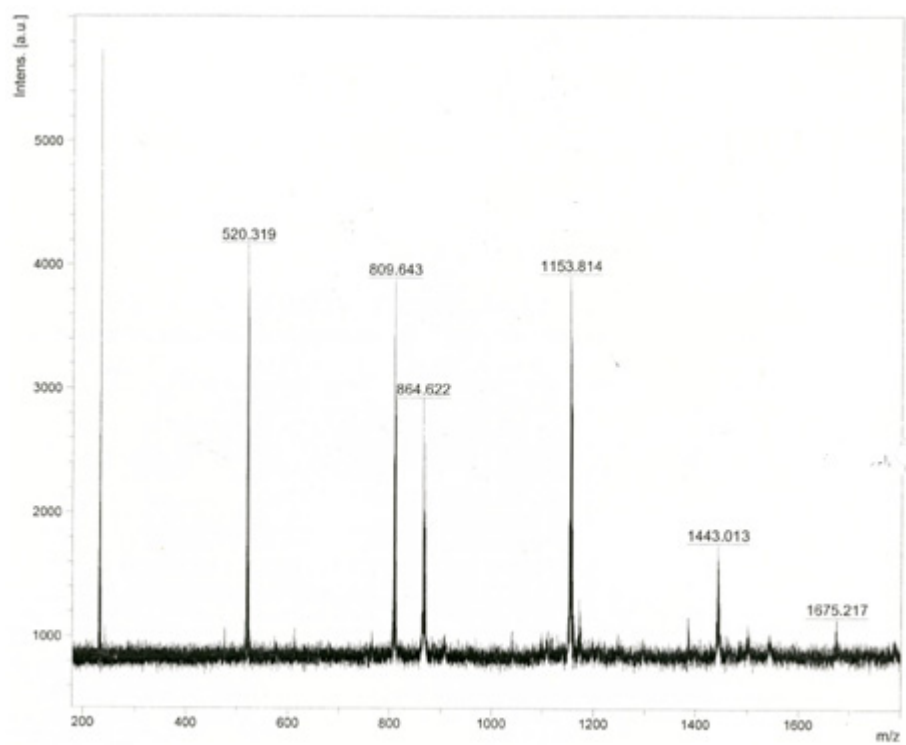

Figure S1. MALDI-TOF MS spectra for **1**.

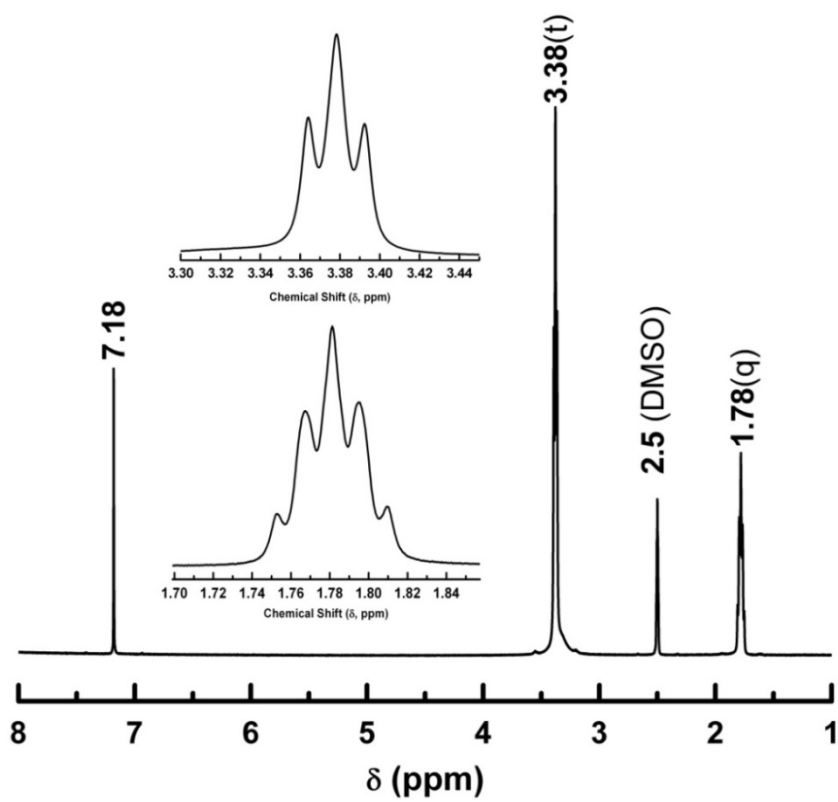

**Figure S2.**  $^1\text{H}$  NMR spectrum of **L1** in  $\text{DMSO-d}_6$ .

gCOSY.fid.esp

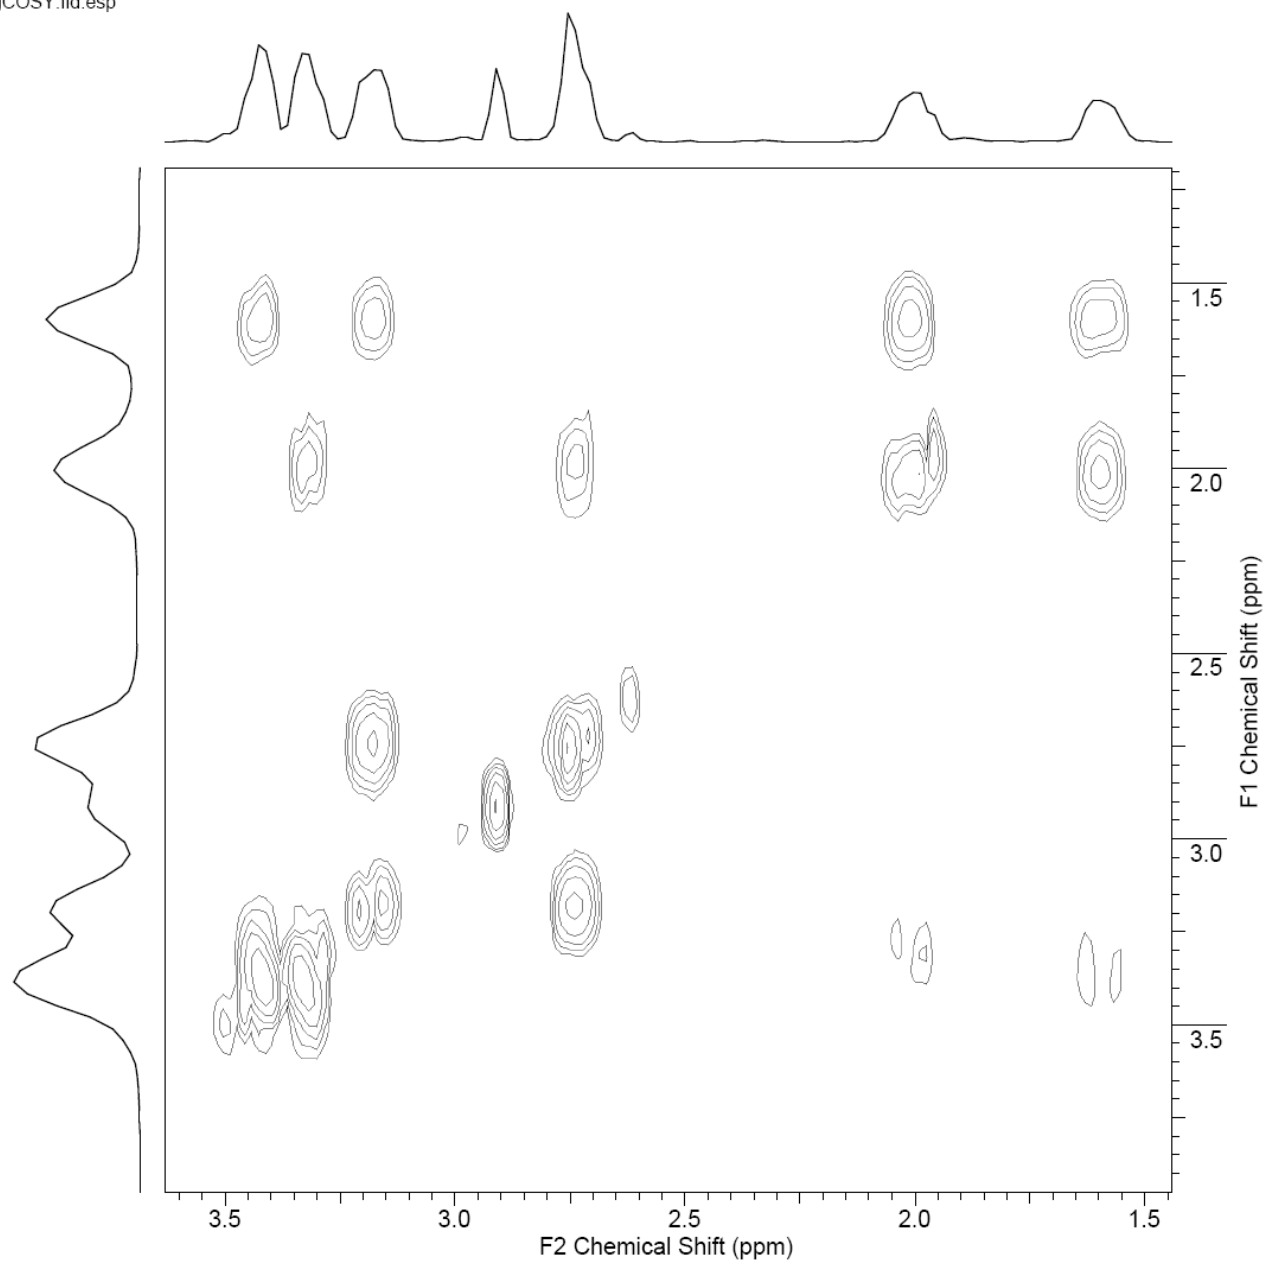

**Figure S3.** <sup>1</sup>H-<sup>1</sup>H gCOSY spectrum for 1S in D<sub>2</sub>O. Peak at 2.9 ppm and side band at 2.71 ppm are assigned for residual DMF solvent molecules from the reaction mixture.

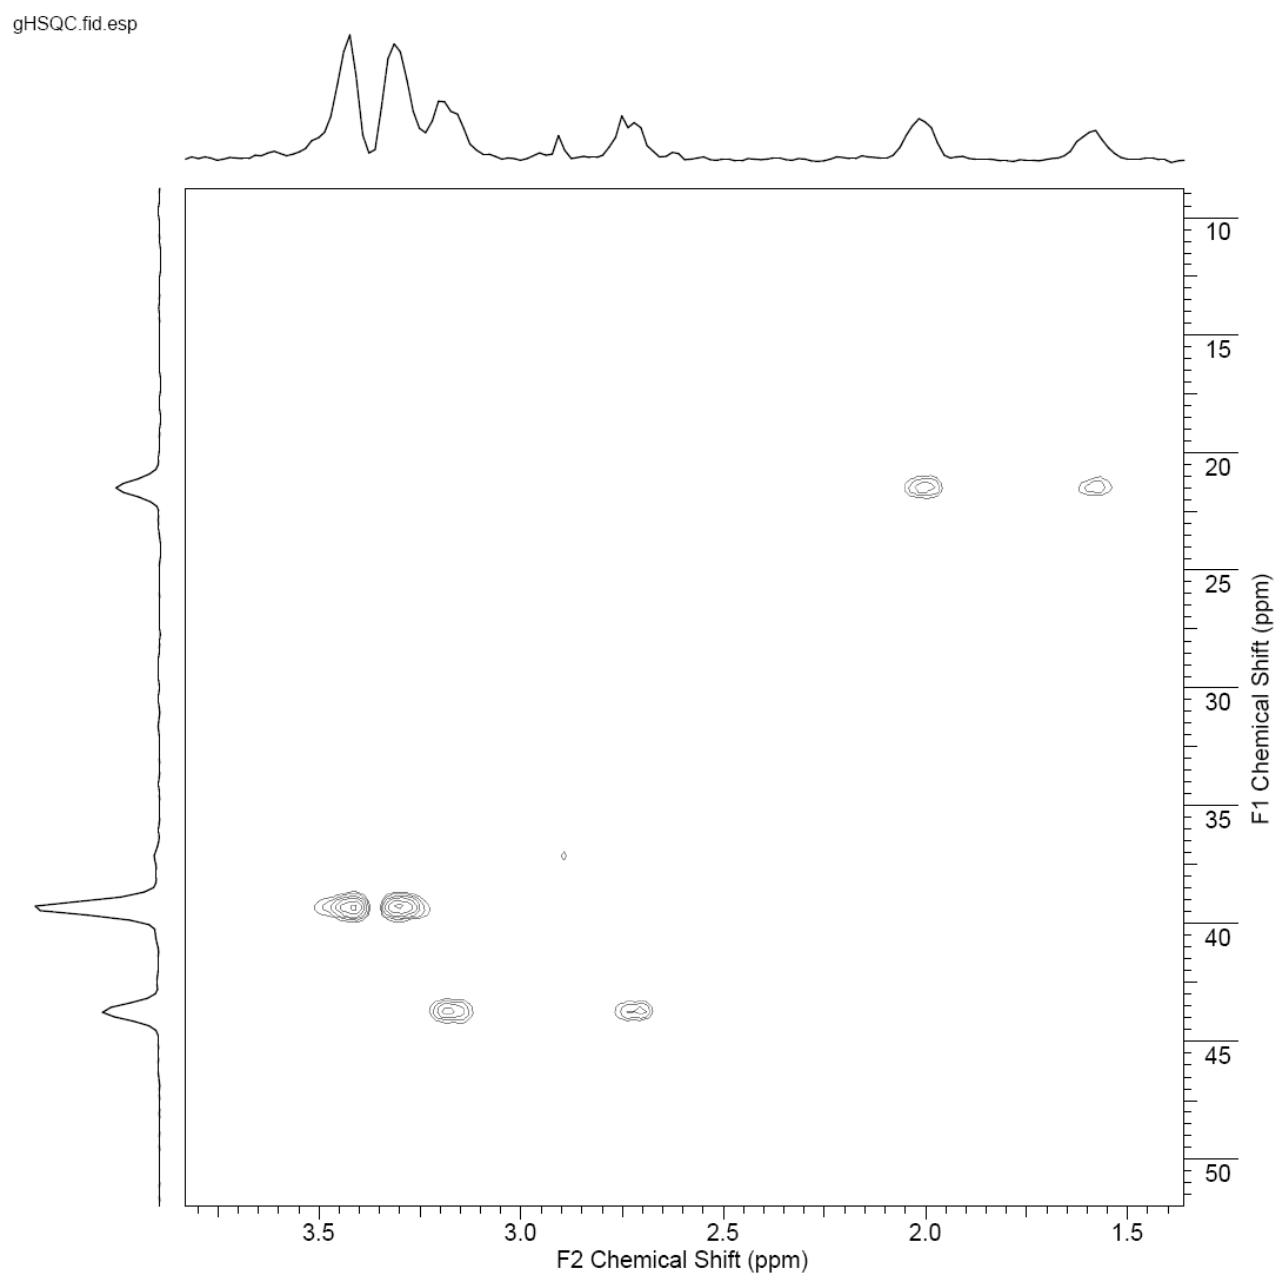

**Figure S4.**  $^1\text{H}\{-^{13}\text{C}\}$  gHSQC spectrum for **1S** in  $\text{D}_2\text{O}$ .

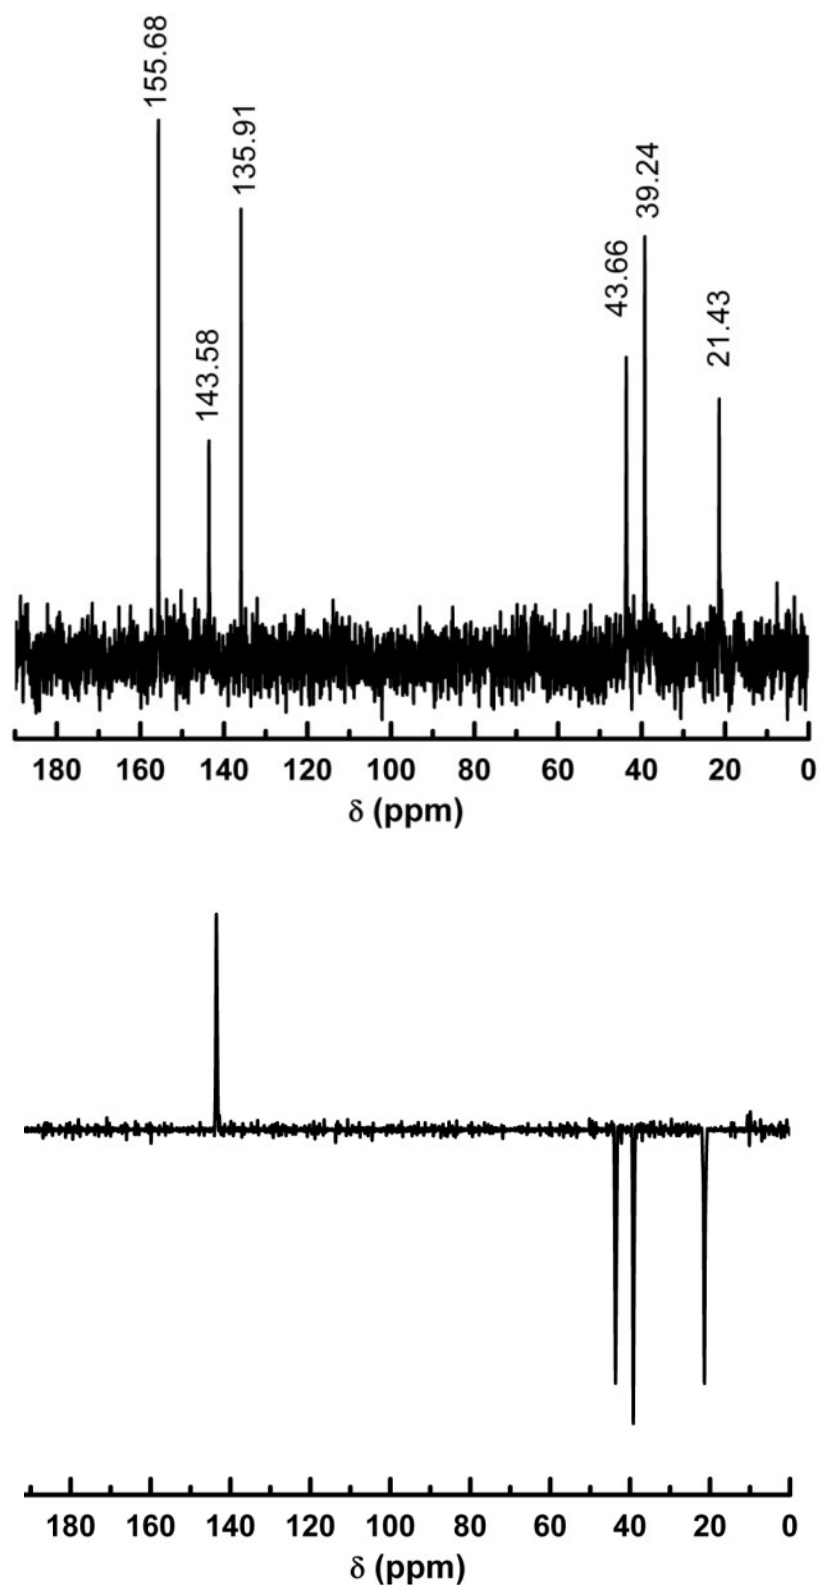

**Figure S5.** (Above)  $^{13}\text{C}$  NMR spectrum of **1S** in  $\text{D}_2\text{O}$ . Peaks at 39.21 ppm and 43.65 ppm indicate different chemical shifts for C(4) and C(6) carbon atoms of *thp* rings, respectively, due to chelation of **L1** to cobalt ions. (Below)  $^{13}\text{C}$  DEPT135° spectrum of **1S** in  $\text{D}_2\text{O}$ .

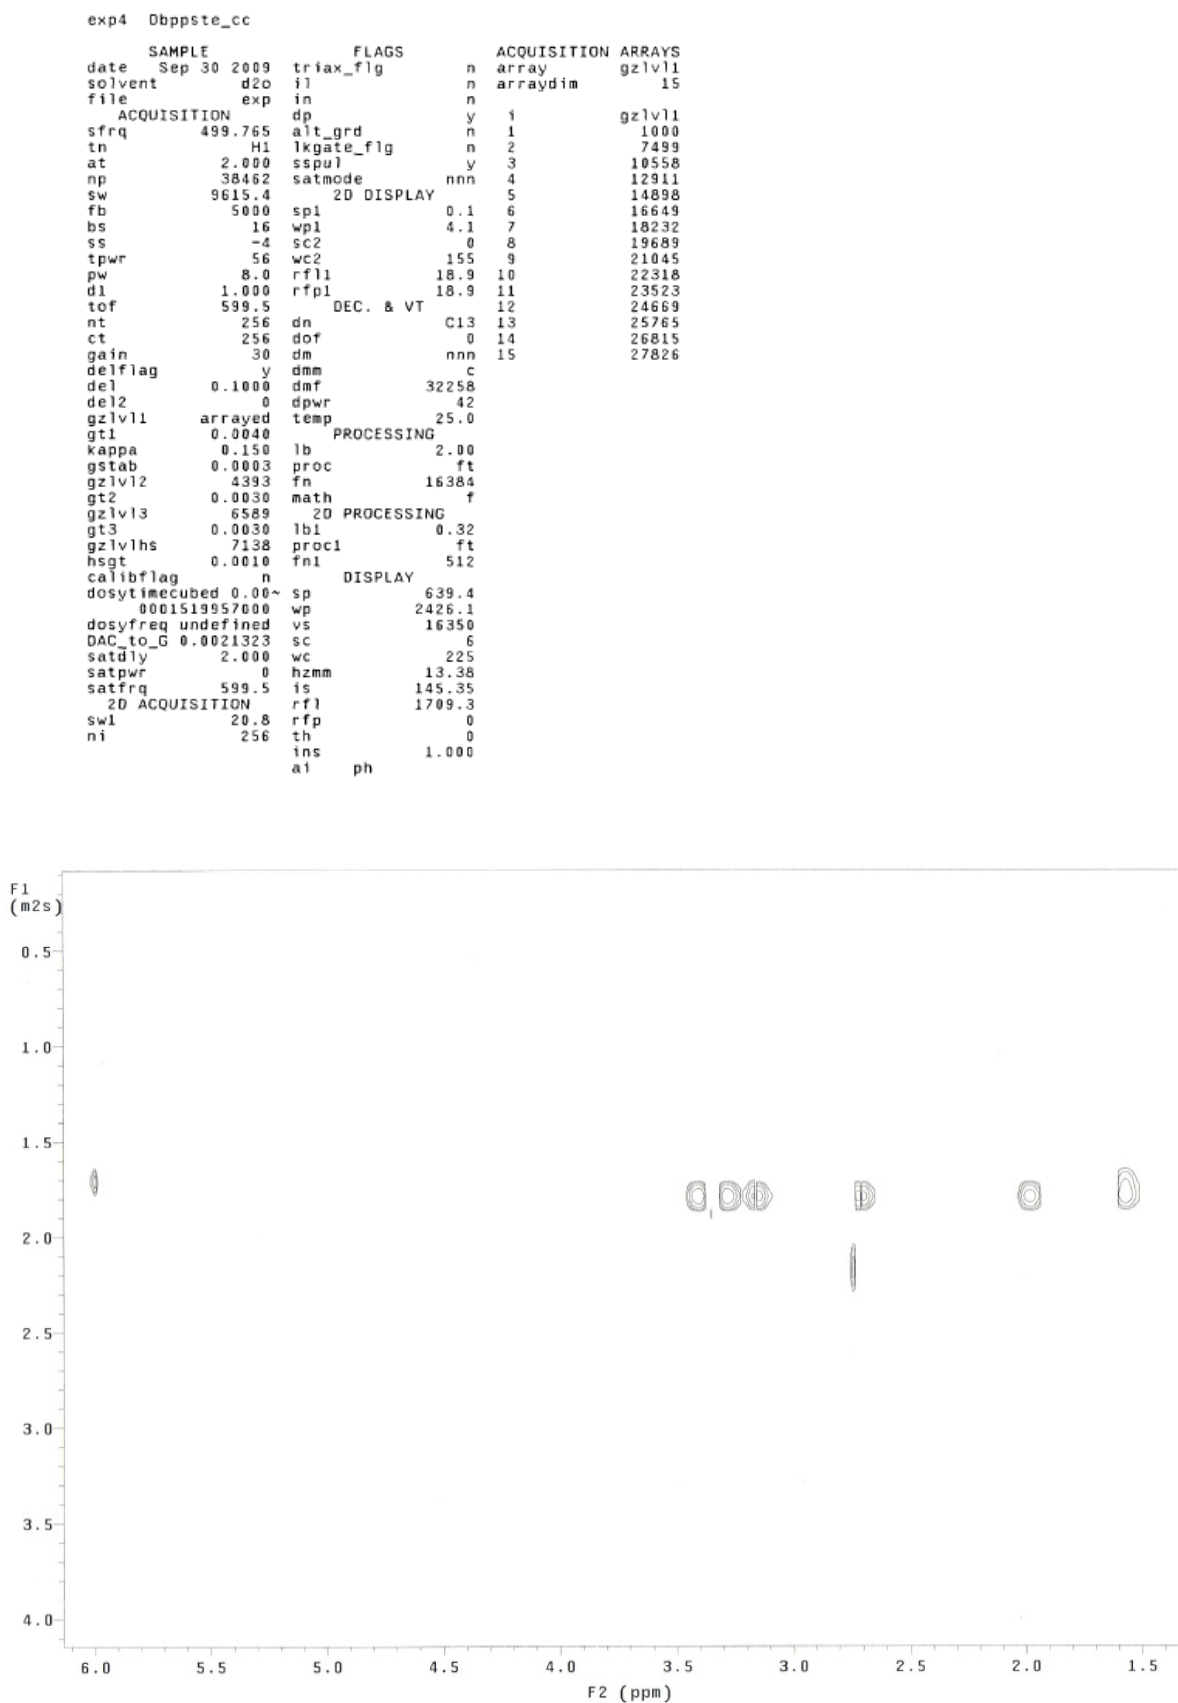

Figure S6.  $^1\text{H}$  2D-DOSY spectrum for 1S, 1.2 mM in  $\text{D}_2\text{O}$  at 298 K.

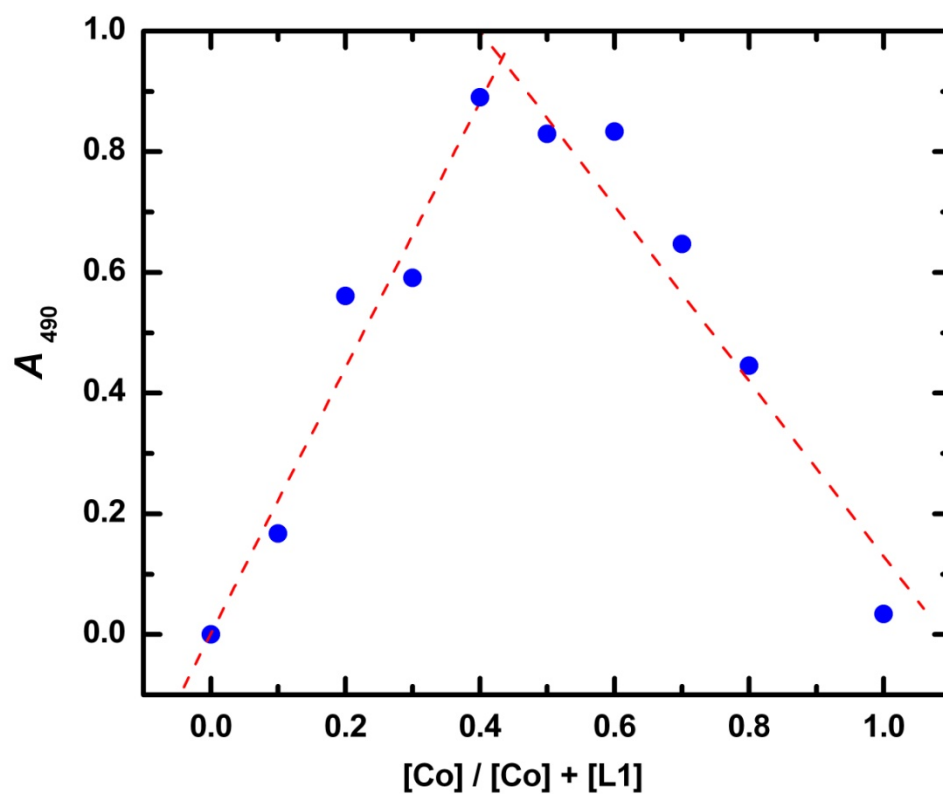

**Figure S7.** Job plot for the two binding species,  $\text{CoCl}_2$  and H-L1 in aqueous solution. Maximum absorbance reached at 0.4 mole fraction of Co ions, corresponding to 1.5:1 (ligand-to-cobalt) stoichiometry.



- ❖ Figures **S8-S13** are NMR spectra for the reaction mixture of  $\text{CoCl}_2 \cdot 6\text{H}_2\text{O}$  (0.1 mmol), **H-L1** (0.3 mmol), and  $\text{NaOCH}_3$  (0.3 mmol) in 1 mL  $\text{D}_2\text{O}$  under aerobic conditions after standing at r.t. for 24 h.

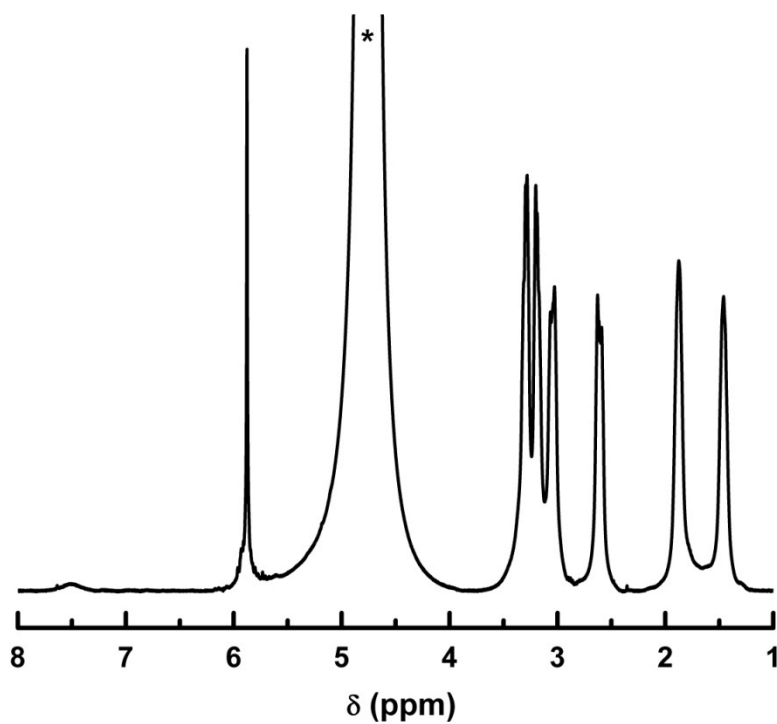

**Figure S8.** The  $^1\text{H}$  NMR spectrum for the reaction mixture.

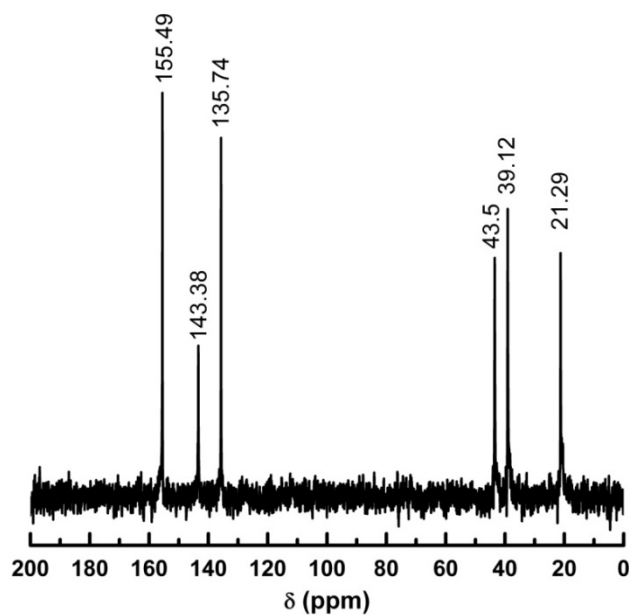

**Figure S9.** The  $^{13}\text{C}$  NMR spectrum for the reaction mixture.

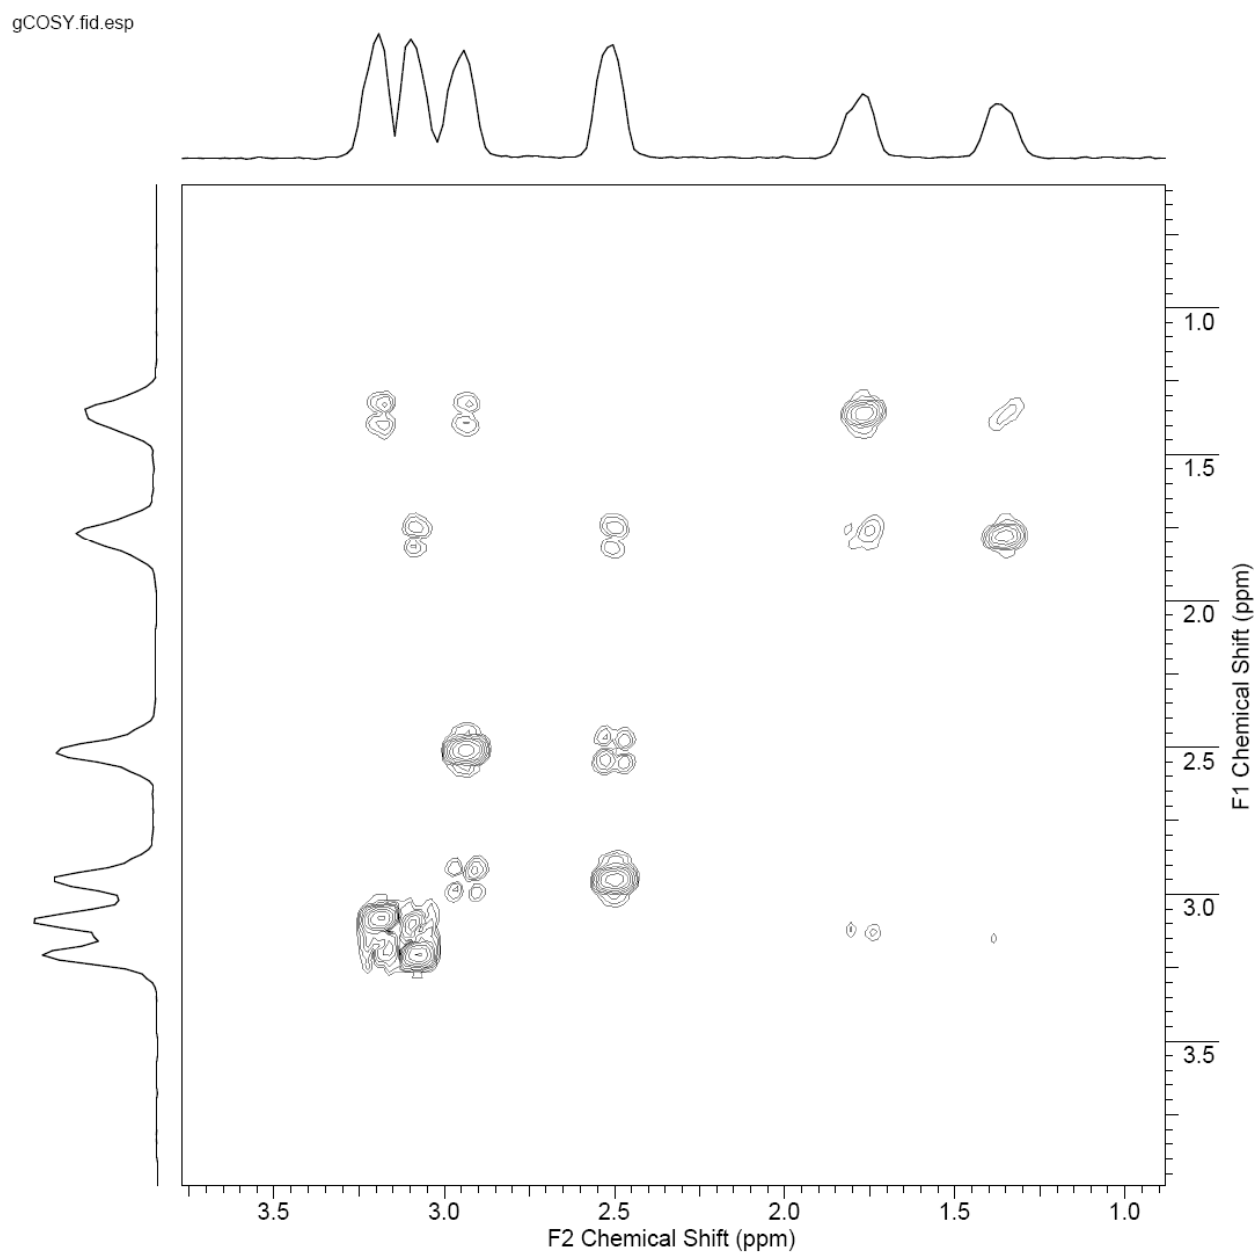

**Figure S10.** The  $^1\text{H}$ - $\{^1\text{H}\}$  gCOSY NMR spectrum for the reaction mixture.

NOESY.esp

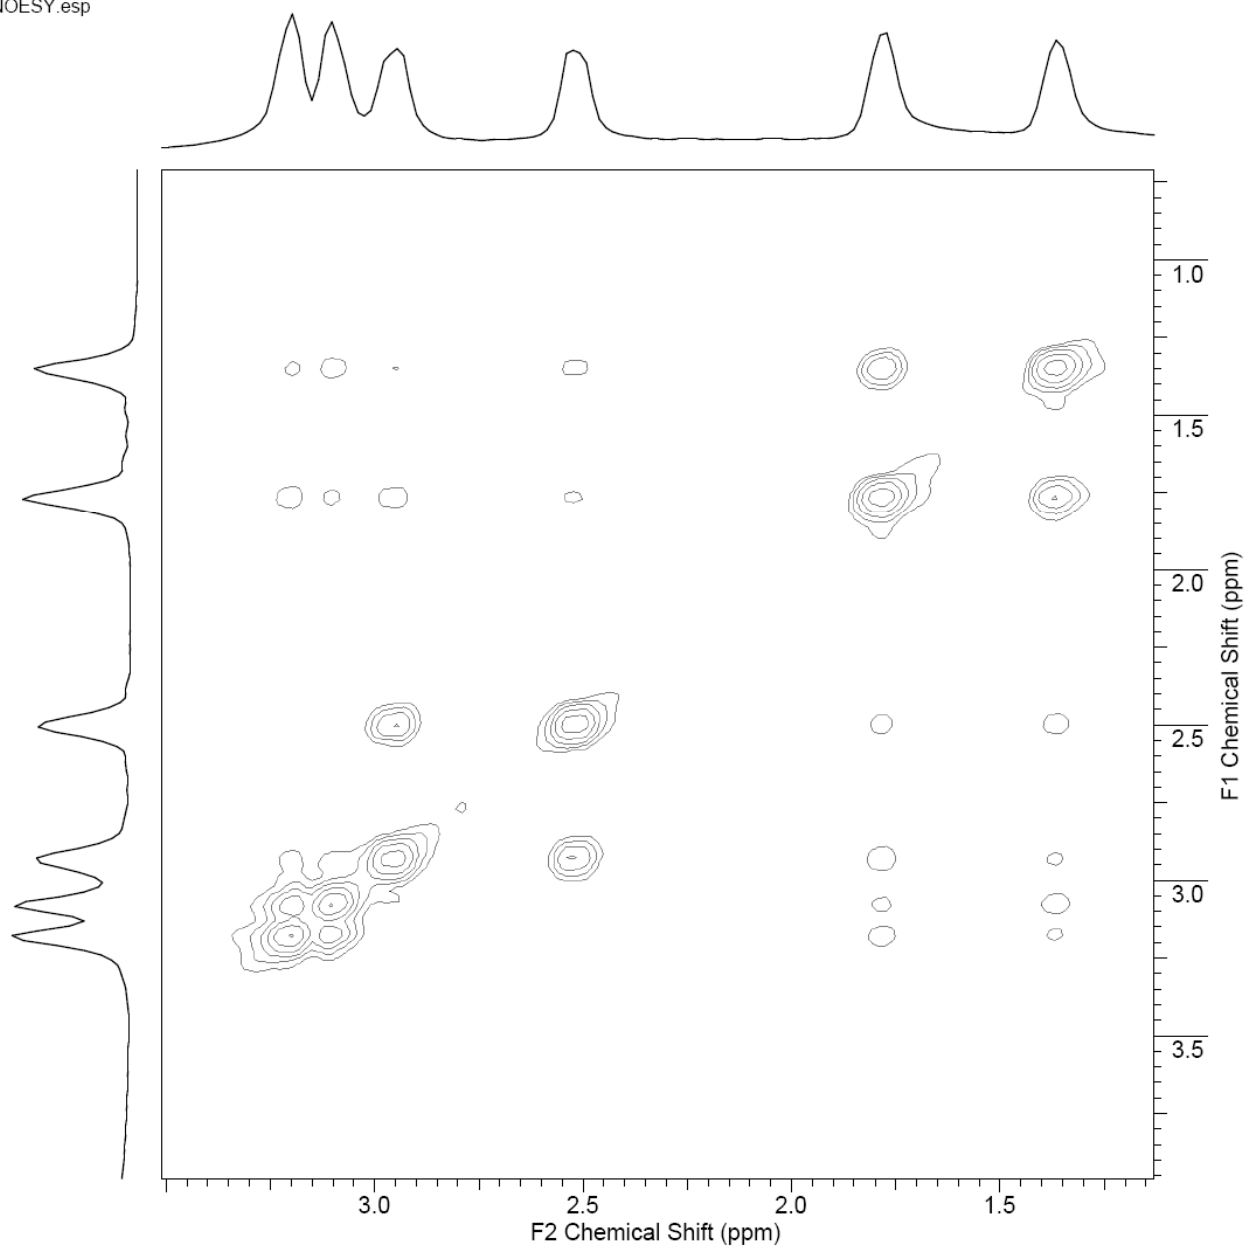

**Figure S11** .  $^1\text{H}$ - $\{^1\text{H}\}$  NOESY NMR spectrum for the reaction mixture.

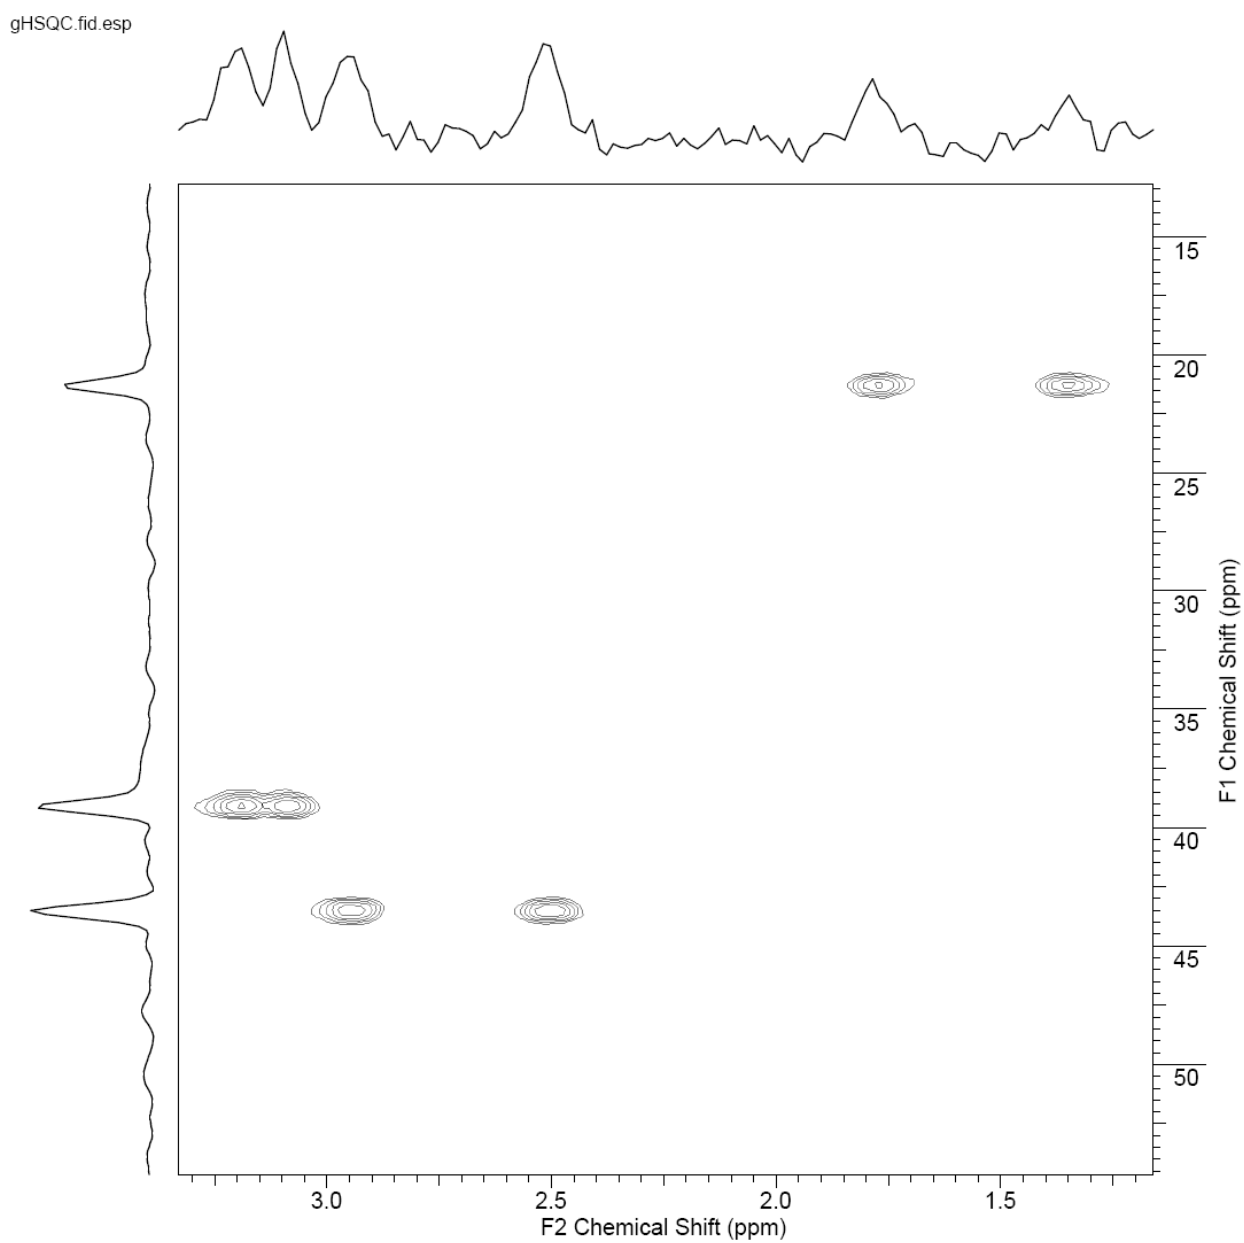

**Figure S12.**  $^1\text{H}$ - $\{^{13}\text{C}\}$  gHSQC NMR spectrum for the reaction mixture.

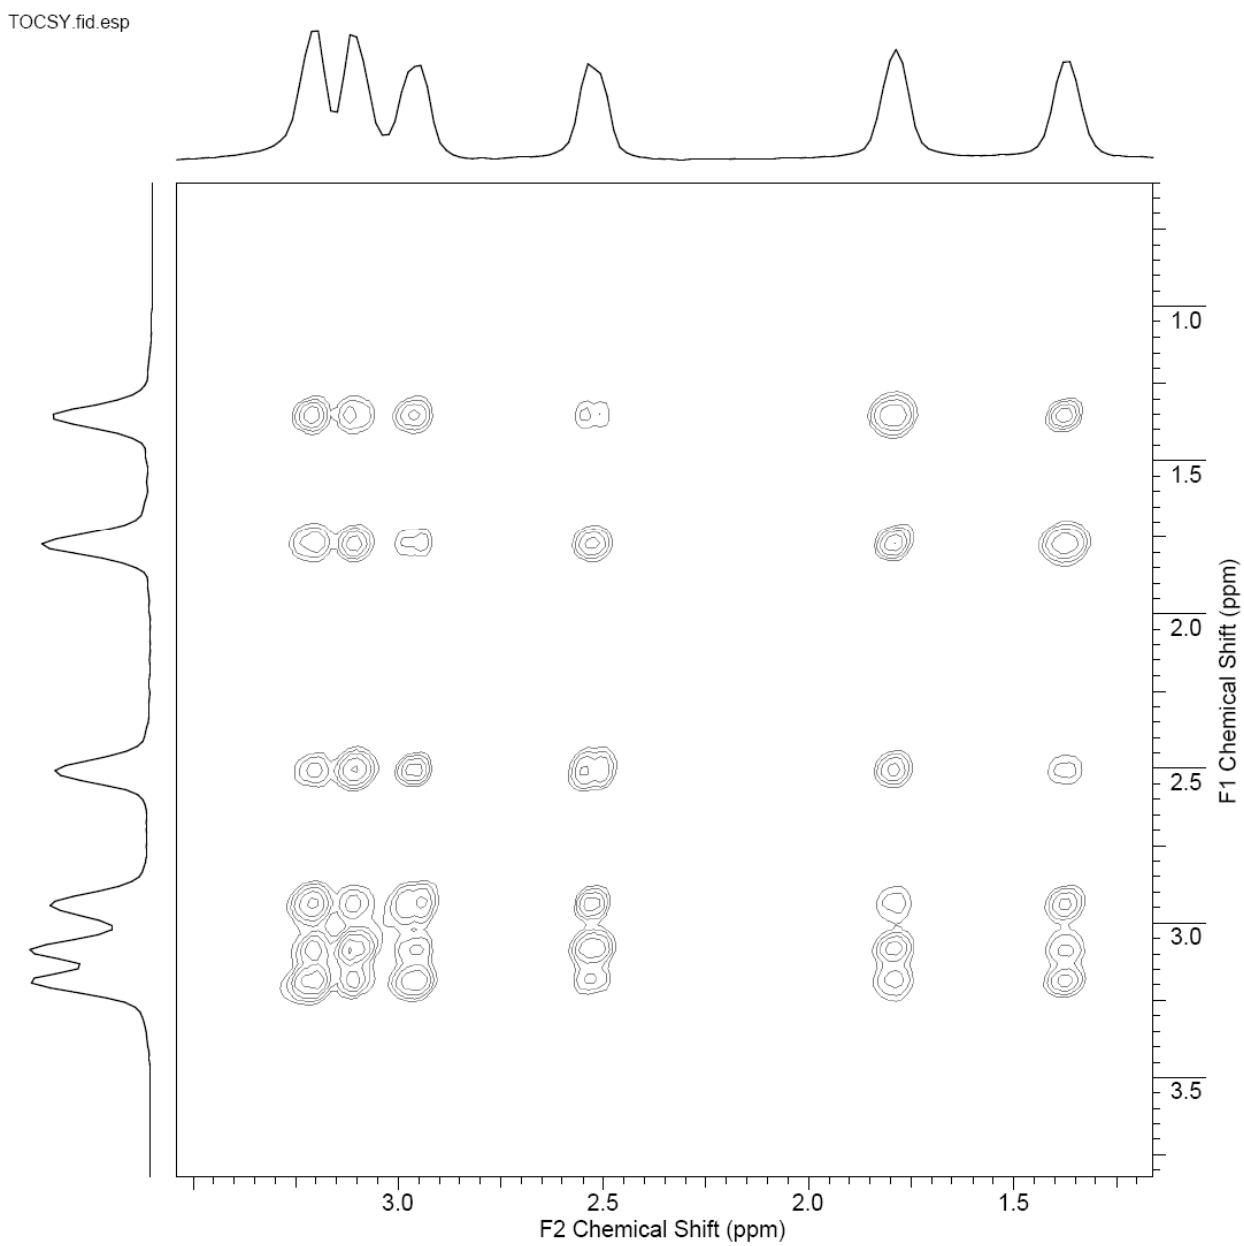

**Figure S13.** The  $^1\text{H}$ - $\{^1\text{H}\}$  TOCSY NMR spectrum for the reaction mixture.

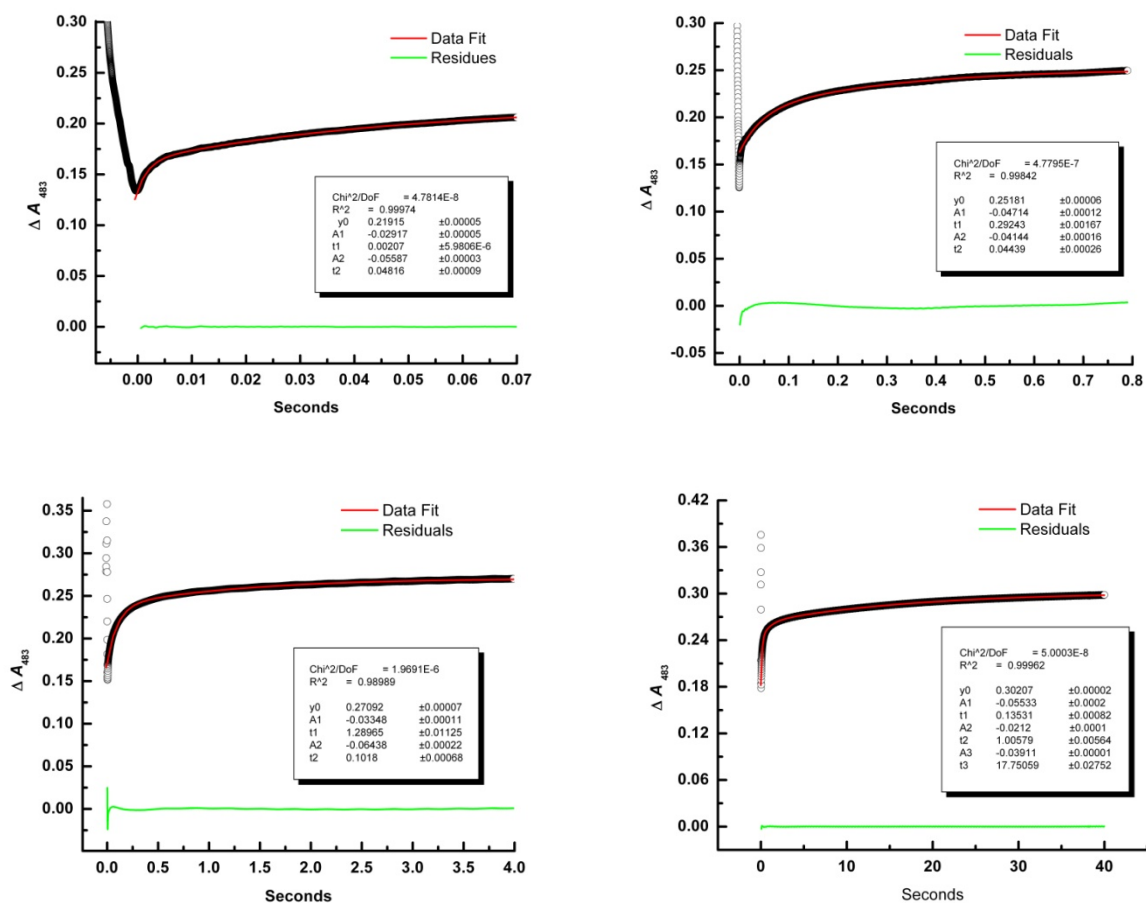

Figure S14. Stopped-flow kinetics of the 483nm absorption band for the complex.

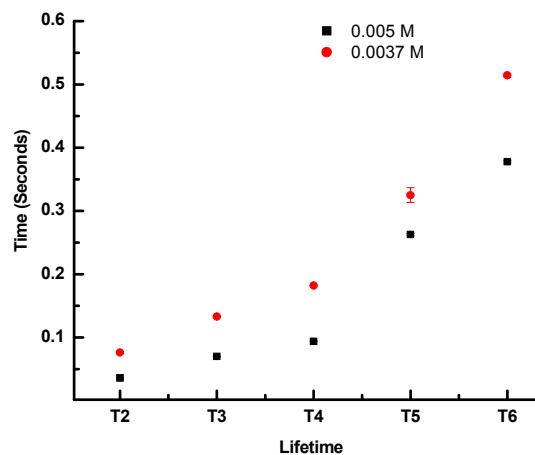

Figure S15. Concentration dependence of lifetime (L1 concentration is indicated in the figure).

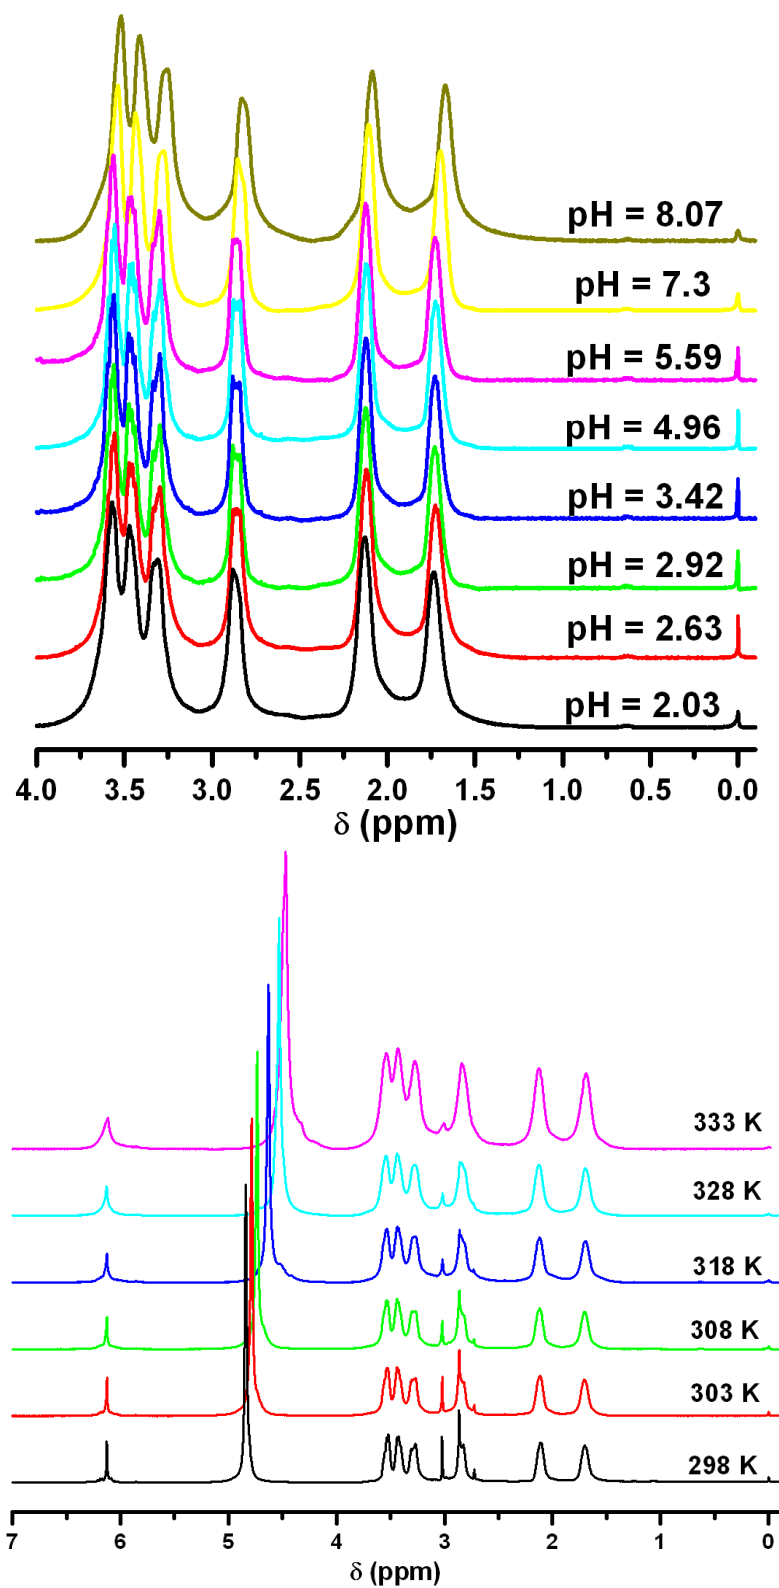

**Figure S16.** (Above)  $^1\text{H}$  NMR spectra for the reaction mixture in  $\text{D}_2\text{O}$  at various apparent solution pH. Spectra acquired at 298 K and referenced to DSS at 0 ppm, (below) variable temperature  $^1\text{H}$  NMR spectra for **1S** in  $\text{D}_2\text{O}$ , spectra are referenced to DSS as an internal standard at 0 ppm.

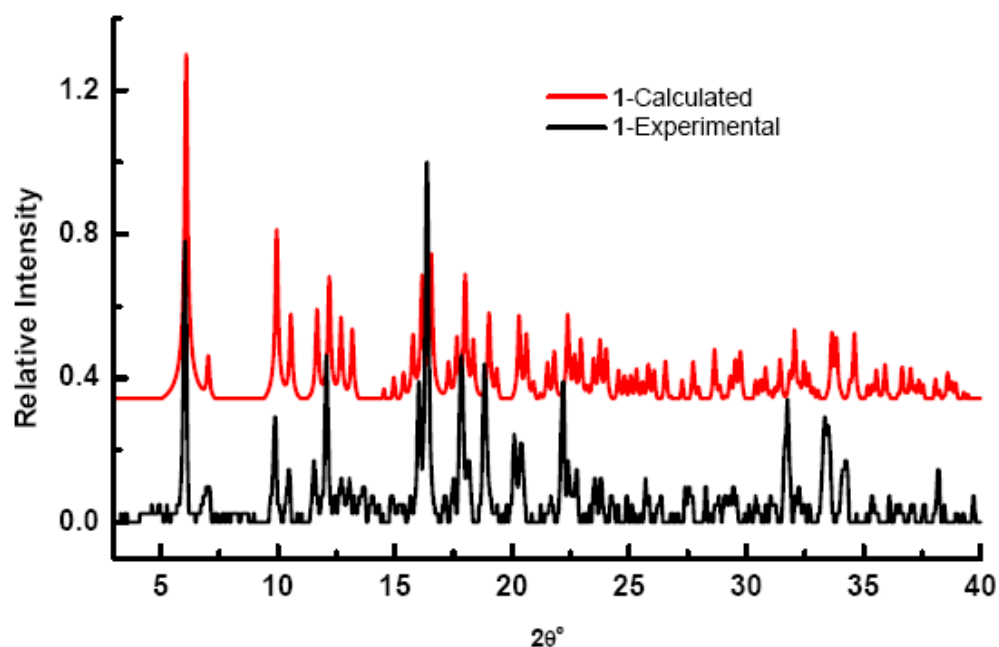

**Figure S17.** Calculated (red) and experimental (black) X-ray powder diffraction patterns for **1**.

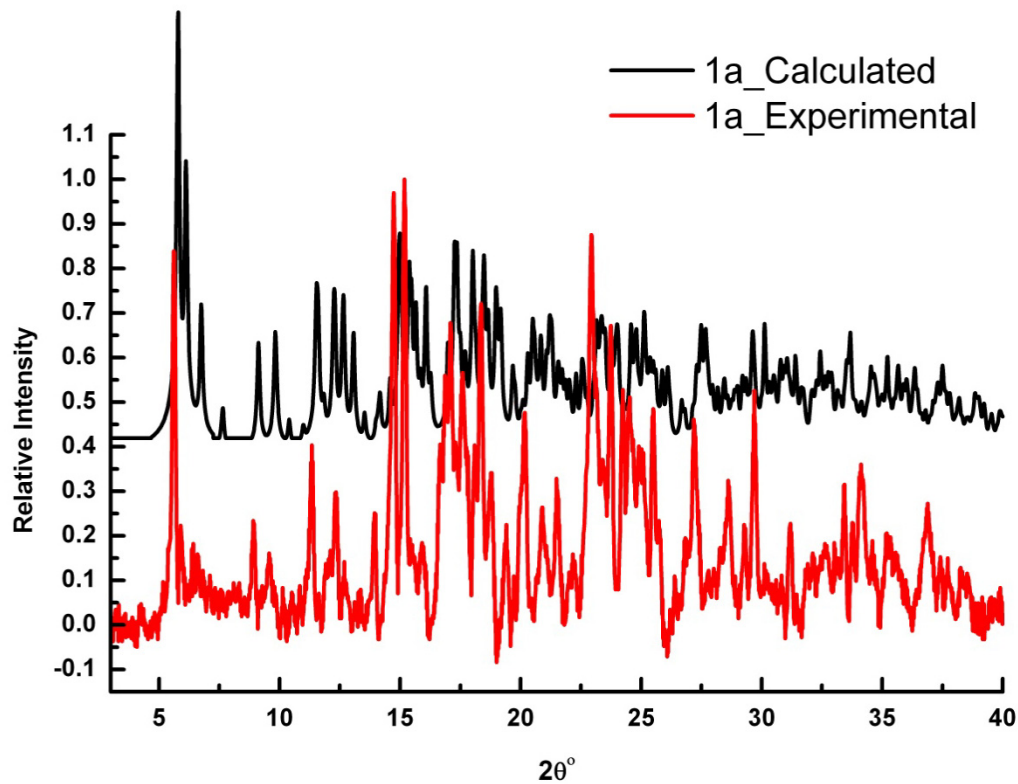

**Figure S18.** Calculated (red) and experimental (black) X-ray powder diffraction patterns for **1a**.



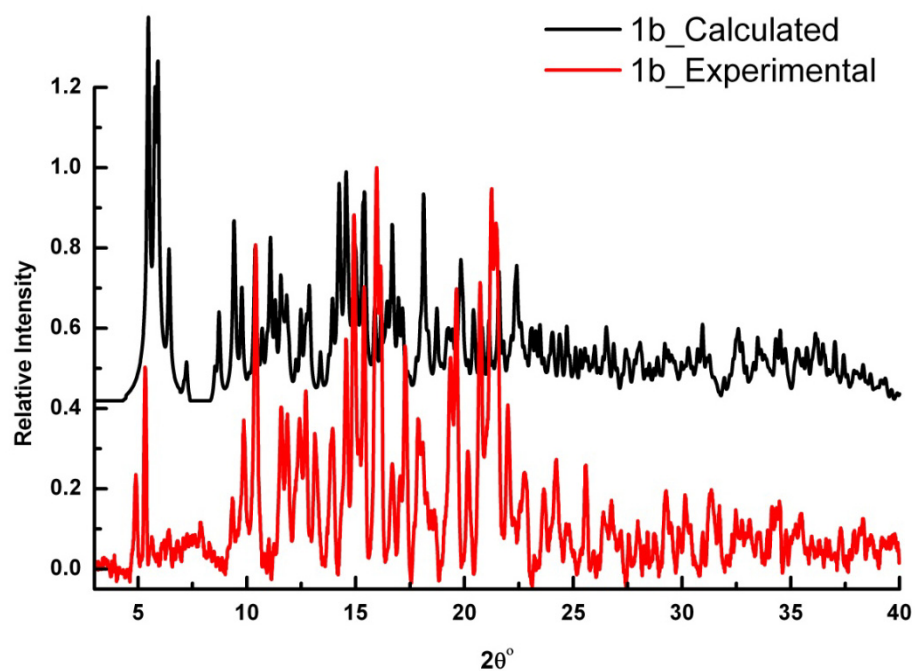

**Figure S19.** Calculated (red) and experimental (black) X-ray powder diffraction patterns for **1b**.

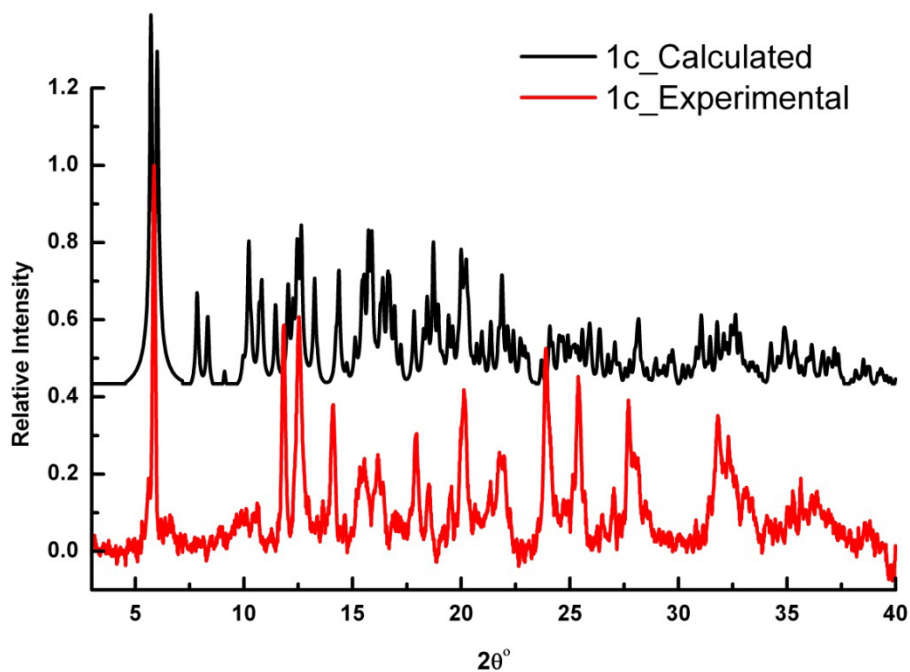

**Figure S20.** Calculated (red) and experimental (black) X-ray powder diffraction patterns for **1c**.

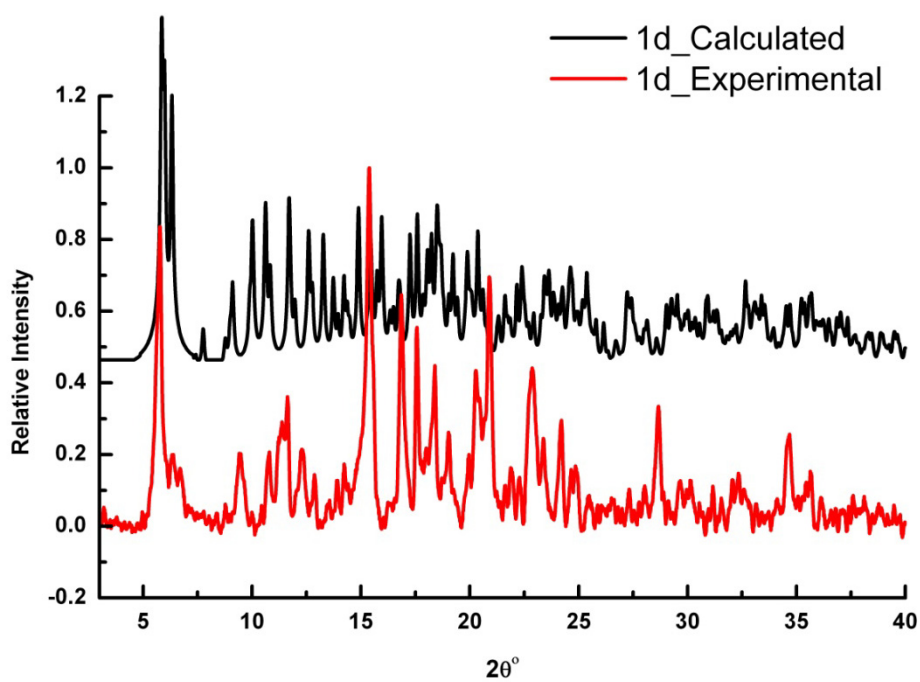

**Figure S21.** Calculated (red) and experimental (black) X-ray powder diffraction patterns for **1d**.

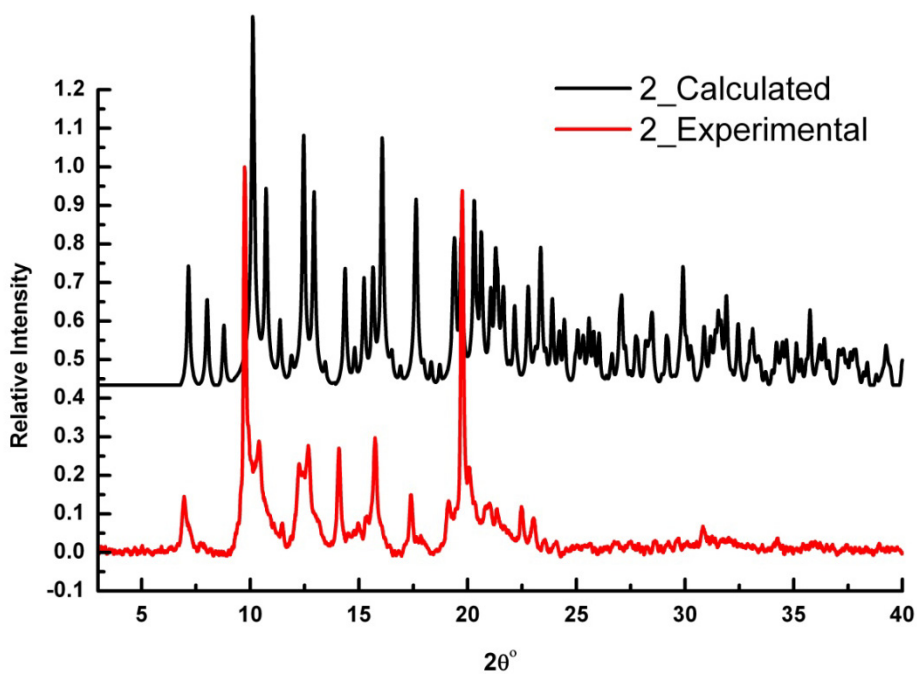

**Figure S22.** Calculated (red) and experimental (black) X-ray powder diffraction patterns for **2**.

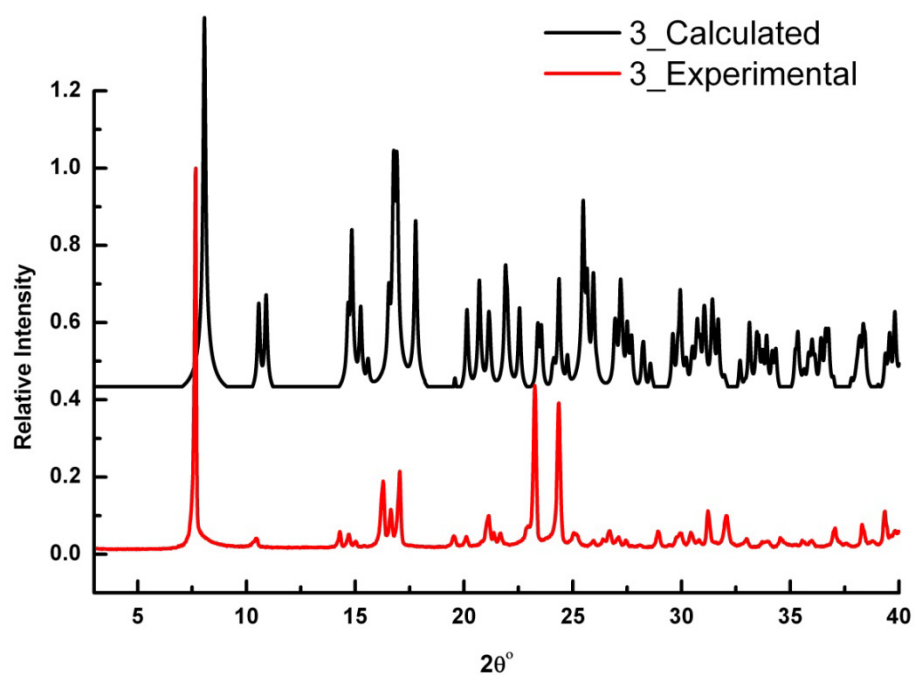

**Figure S23.** Calculated (red) and experimental (black) X-ray powder diffraction patterns for **3**.

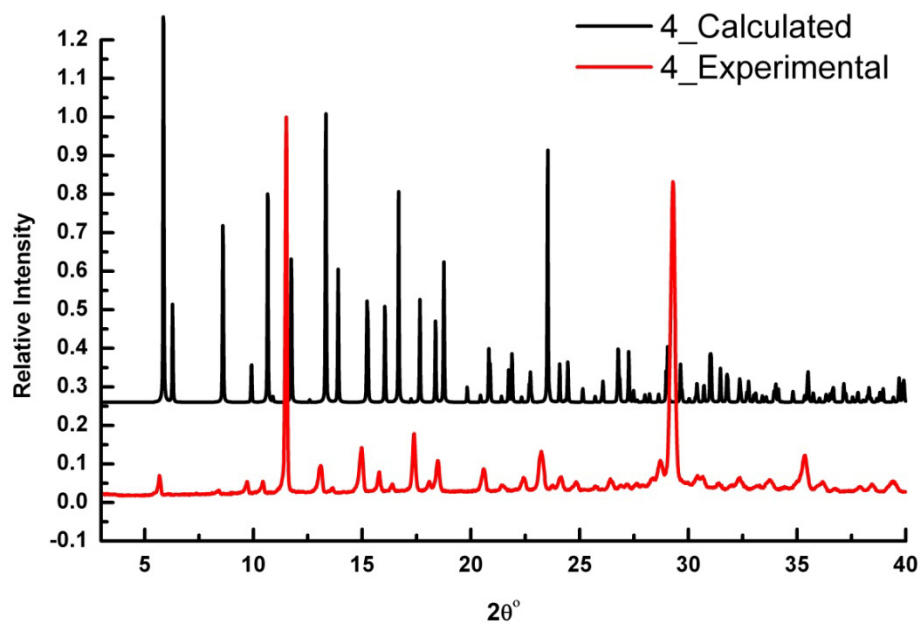

**Figure S24.** Calculated (red) and experimental (black) X-ray powder diffraction patterns for **4**.

## References

1. Bruker-AXS (2001). SMART-V5.625. Data Collection Software. Madison, Wisconsin, USA.
2. Bruker-AXS (2001). SAINT-V6.28A. Data Reduction Software. Madison, Wisconsin, USA.
3. Sheldrick, G. M. (1996). SADABS. Program for Empirical Absorption Correction. University of Gottingen, Germany.
4. (a) Sheldrick, G. M. SHELXTL, v. 6.10; Bruker-AXS Madison, Wisconsin, USA. 2000. (b) Farrugia L. *J. Appl. Cryst.* **1999**, 32, 837-838. (c) Sheldrick, G.M. *Acta Cryst.* **2008**, A64, 112-122. (d) Sheldrick, G.M. *Acta Cryst.* **1990**, A46, 467-473.
5. Gaussian 03, Revision C.02, M. J. Frisch, G. W. Trucks, H. B. Schlegel, G. E. Scuseria, M. A. Robb, J. R. Cheeseman, J. A. Montgomery, Jr., T. Vreven, K. N. Kudin, J. C. Burant, J. M. Millam, S. S. Iyengar, J. Tomasi, V. Barone, B. Mennucci, M. Cossi, G. Scalmani, N. Rega, G. A. Petersson, H. Nakatsuji, M. Hada, M. Ehara, K. Toyota, R. Fukuda, J. Hasegawa, M. Ishida, T. Nakajima, Y. Honda, O. Kitao, H. Nakai, M. Klene, X. Li, J. E. Knox, H. P. Hratchian, J. B. Cross, V. Bakken, C. Adamo, J. Jaramillo, R. Gomperts, R. E. Stratmann, O. Yazyev, A. J. Austin, R. Cammi, C. Pomelli, J. W. Ochterski, P. Y. Ayala, K. Morokuma, G. A. Voth, P. Salvador, J. J. Dannenberg, V. G. Zakrzewski, S. Dapprich, A. D. Daniels, M. C. Strain, O. Farkas, D. K. Malick, A. D. Rabuck, K. Raghavachari, J. B. Foresman, J. V. Ortiz, Q. Cui, A. G. Baboul, S. Clifford, J. Cioslowski, B. B. Stefanov, G. Liu, A. Liashenko, P. Piskorz, I. Komaromi, R. L. Martin, D. J. Fox, T. Keith, M. A. Al-Laham, C. Y. Peng, A. Nanayakkara, M. Challacombe, P. M. W. Gill, B. Johnson, W. Chen, M. W. Wong, C. Gonzalez, and J. A. Pople, Gaussian, Inc., Wallingford CT, 2004.
6. (a) A.D.Becke. *J.Chem.Phys.* **1993**, 98, 5648-5642. (b) P.J.Stephens, F.J.Devlin, C.F.Chabrowski, M.J.Frisch, *J.Phys.Chem.* **1994**, 98, 11623-11627. (c) R.H.Hertwig, W.Koch, *Chem.Phys.Lett.* **1997**, 268, 345-351.
7. (a) Dunning Jr., T. H.; Hay, P. J. "Methods of Electronic Structure Theory", Vol. 2, H. F. Schaefer III, ed., PLENUM PRESS (1977). (b) Hay, P. J.; Wadt, W. R. *J. Chem. Phys.* **1985**, 82, 270.
